# Supplementary material for: Preconception Care Uptake and Immediate Outcomes among Discordant Couples Accessing Routine HIV Care in Kenya
Source: Obstet Gynecol Int. 2020 Jun 9;2020:1675987. doi: 10.1155/2020/1675987 (PMC7301190; doi:10.1155/2020/1675987)
Supplement: Supplementary Materials — Table 3 Study database. [file 1675987.f1.xlsx]

## Sheet: Preconception care data
Dateofenrolment	age_Female	HIVstatus_Female	age_Male	HIVstatus_Male	Educ_Female	Educ_Male	Fertilitydesire	LastCD4	LastCD4Date	LastVL	LastVLDate	MissedVisits	EverMisseddoses	ReportedMisseddoses_NoOftimes	ContraceptiveUse	Condomuse	YearOfDiagnosis_pos	Gender_pos	DurationOfRelationship_pos	ComorbidityOtherInfections_pos	InitialWHOStage_pos	CurrentWHOstage_pos	RalatedWHOInfection_pos	BaselineCD4_pos	DateofCD4Count_pos	CurrentCD4_pos	DateofCD4Count_pos_A	durcurrentcd4	BaselineViralLoad_pos	Date_pos	CurrentViralLoad_pos	Dateofviralload_pos	VIRALLOADPreconceptionRoutine_pos	StartRegimen_pos	StartRegimenDate_pos	CurrentART_pos	DateofARTInitiation_pos	AdverseReactionstoRegimentSideEffects_pos	BMIStatus_pos	TBSTATUS_pos	TBOUTCOME_pos	FAMILYPLANING_pos	DateofFamilyPlanning_pos	CONDOMUSE_pos	PROPHYLAXIS_pos	OIRX_pos	FertilityDesired_pos	ARTAdherence_pos	AdherenceOutcomesReasons_pos
07:00:00 PM	39.3	Negative	52.7	Positive			Yes	749	2015-07-20	20	2014-05-22	2		0		Yes	1998	male	18	DUODENAL ULCER R/O U.COLITIS	1	1	Asymptomatic	804	2014-04-30	749	2015-07-20	14	UNDETECTABLE	41781	UNDETECTABLE	42213	Preconception	TDF + 3TC + EFV .	30/04/2014	TDF,3TC,EFV	30/04/2014	NONE	33.6	No signs or symptoms	None	None		YES	CTX	NONE	YES	No	None
01:00:00 AM	30.1	Positive	39.3	Negative			Yes	459	2015-08-04	#NULL!	#NULL!	7		0		Yes	2008	Female	10	ALLERGIC DERMATITIS	1	1	Asymptomatic	354	2013-06-18	459	2015-08-04	25	NONE		NONE		NONE	AZT,3TC,NVP	18/08/2014	AZT,3TC,NVP	18/08/2014	NONE	29.5	No signs or symptoms	None	None		YES	CTX	NONE	YES	No	None
10:00:00 AM	30.1	Positive	39.3	Negative			Yes	686	2015-09-08	#NULL!	#NULL!	1		0		Yes	2010	Female	#NULL!	none	1	1	Asymptomatic	599	2014-06-20	686	2015-08-08	13	NONE		NONE		NONE	TDF + 3TC + EFV .	31/03/2015	TDF,3TC,EFV	31/03/2015	none	18.4	No signs or symptoms	None	None		yes	CTX	NONE	YES	No	None
07:00:00 AM	41.4	Negative	48.1	Positive		Secondary		158	2014-12-01	20	2014-12-01	2		0		Yes	2010	male	8	Hypertension, POST HERPETIC NEURALGIA/EPILEPSY	2	2	herpes zoster	156	2014-02-18	158	2014-12-01	9	<20copies	41659	UNDETECTABLE	16.12.2014	preconception	AZT + 3TC + EFV .	20/01/2014	AZT, 3TC, EFV	20/01/2014	NONE	24.7	No signs or symptoms	None	None		YES	CTX	NONE	YES	No	None
07:00:00 AM	28.3	Positive	26	Negative	Primary			740	2015-03-12	#NULL!	#NULL!	3	Yes	3		Yes	2010	Female	7	none	2	2	Recurrent URTI	396	2012-06-15	847	2015-09-07	38	NONE		NONE		NONE	TDF + 3TC + EFV .	41643	TDF,3TC,EFV	41643	NONE	20.6	No signs or symptoms	None	DEPO	42187	YES	CTX	NONE	YES	Yes	Forgott
03:00:00 AM	27.4	Positive	49.1	Negative			Yes	683	2015-05-19	90	2014-06-23	6		0		Yes	2014	Female	4	None	1	1	Asymptomatic	371	2014-02-13	683	2015-05-19	15	90 Copies	41813	UNDETECTABLE	42235	Routine Viral load	TDF + 3TC + EFV .	41888	TDF,3TC,EFV	41888	NONE	26.7	No signs or symptoms	None	None		YES	CTX	NONE	YES	No	None
03:00:00 AM	40.3	Negative	43.3	Positive			Yes	758	2015-04-07	#NULL!	#NULL!	16		0		Yes	2013	male	28	Allergic Dermatitis, Asthma	2	2	Recurrent URTI sep 2013	203	2013-09-18	687	2015-10-13	24	NONE		NONE		NONE	TDF + 3TC + EFV .	41496	TDF,3TC,EFV	41496	NONE	21.2	No signs or symptoms	None	None		YES	CTX	NONE	YES	No	None
04:00:00 AM	42.5	Negative	47.7	Positive				389	2015-06-16	20	2015-06-16	2		0		Yes	2007	male	17	Diabetes since 2003/ALLERGIC DERMATITIS	2	2	Skin manifestation	337	2013-08-02	389	2015-06-17	22	UNDETECTABLE	42146	UNDETECTABLE	42181	Routine Viral load	AZT+3TC+NVP .	41402	AZT,3TC,NVP	41402	YES	19.3	No signs or symptoms	None	None		YES	CTX	NONE	YES	NO	None
11:00:00 PM	35.9	Negative	37.3	Positive			Yes	176	2014-09-16	#NULL!	#NULL!	5		0		Yes	2014	male	5	None	2	2	Weight Loss	55	2014-03-25	176	2014-10-16	6	NONE		NONE		NONE	TDF + 3TC + EFV .	41886	TDF,3TC,EFV	41886	NONE	19.9	No signs or symptoms	None	None		YES	CTX	NONE	YES	No	None
06:00:00 AM	#NULL!	Negative	27.5	Positive				508	2015-07-24	#NULL!	#NULL!	7		0		Yes	2013	male	5	NoNE	1	1	Asymptomatic	317	2013-09-10	508	2015-07-24	22	NONE		NONE		NONE	TDF + 3TC + EFV .	41405	TDF,3TC,EFV	41405	NONE	19.6	No signs or symptoms	None	None		YES	CTX	NONE	NO	No	None
05:00:00 PM	29.4	Negative	42.4	Positive			Yes	1008	2015-08-10	20	2015-08-10	8		0		Yes	2013	male	7	NoNE	1	2	Minor skin manifestation	751	2013-10-02	1008	2015-08-10	22	1626 COPIES	16.12.2014	UNDETECTABLE	42235	Routine Viral load	TDF + 3TC + EFV .	41315	TDF,3TC,EFV	41315	NONE	20	No signs or symptoms	None	None		YES	CTX	NONE	YES	No	None
06:00:00 PM	31.4	Positive	#NULL!	Negative			Yes	469	2015-03-02	20	2015-03-02	20		0		Yes	2011	Female	5	TB peritonitis 2013	4	4	Extrapulmonary TB	29	2013-10-03	566	2015-09-14	23	136866	41564	UNDETECTABLE	42068	Routine Viral load	TDF + 3TC + EFV .	40725	AZT,3TC,LVP/r	41343	NONE	21.4	Completed Treatment	(November 2013)Completed Treatment	None		YES	CTX	TB	YES	No	None
07:00:00 PM	24	Negative	39.4	Positive				879	2015-09-03	20	2015-04-09	1		0		Yes	2014	male	5	VARICOSITIES,	2	2	Parotid Enlargement	1302	2014-03-21	879	2015-09-03	17	UNDETECTABLE	42110	UNDETECTABLE	42261	Routine Viral load	TDF + 3TC + EFV .	41674	TDF,3TC,EFV	41674	NONE	27.5	No signs or symptoms	None	None		YES	CTX	NONE	YES	No	None
08:00:00 PM	47.8	Positive	51.3	Negative			Yes	292	2015-06-05	20	2015-05-08	1		0		Yes	2014	Female	22	Fibroids/ALLERGIC DERMATITIS/ATHRALGIA	1	1	Asymptomatic	138	2014-10-24	292	2015-06-05	7	UNDETECTABLE	42146	UNDETECTABLE	42146	Routine Viral load	TDF + 3TC + EFV .	41831	TDF,3TC,EFV	41831	NONE	27.5	No signs or symptoms	None	None		YES	CTX	NONE	YES	No	None
06:00:00 PM	33.8	Negative	45.8	Positive				581	2015-01-12	#NULL!	#NULL!	4		0		Yes	2004	male	4	NoNE	3	3	Pulmonary TB 2003	439	2013-09-09	599	2015-07-22	22	UNDETECTABLE	28.07.2015	UNDETECTABLE	28.07.2015	Routine Viral load	TDF + 3TC + EFV .	41526	TDF,3TC,EFV	41526	NONE	21.4	No signs or symptoms	None	None		YES	CTX	NONE	YES	No	None
12:00:00 PM	31.6	Negative	36.1	Positive				930	2015-08-31	#NULL!	#NULL!	0		0		Yes	2013	male	#NULL!	HTN	1	1	Asymptomatic	792	2013-11-19	930	2015-08-31	21	UNDETECTABLE	42261	UNDETECTABLE	42261	Routine Viral load	TDF + 3TC + EFV .	41647	TDF,3TC,EFV	41647	none	27	No signs or symptoms	None	None		yes	CTX	NONE	NO	No	None
12:00:00 AM	43.6	Negative	43.3	Positive		Secondary		155	2015-08-12	20	2015-08-12	0		0		Yes	2006	male	#NULL!	none	3	3	Oral candidiasis thrush	459	2006-12-22	208	2015-08-12	103	UNDETECTABLE	42235	UNDETECTABLE	42235	Preconception	TDF + 3TC + NVP .	41640	TDF,3TC,NVP	41640	none	25.65	No signs or symptoms	None	None		yes	CTX	NONE	NO	No	None
08:00:00 AM	37.1	Positive	45.8	Negative				716	2015-03-05	20	2015-03-05	0		0		Yes	2010	Female	2	HERPES GENITALIS	3	3	Pulmonary TB Smear +	610	2011-07-25	545	2015-10-07	50	UNDETECTABLE	42082	UNDETECTABLE	42082	Routine Viral load	TDF + 3TC + EFV .	40299	TDF,3TC,EFV	40299	none	23.9	No signs or symptoms	None	None		yes	CTX	NONE	YES	No	None
06:00:00 AM	40.1	Positive	43.6	Negative			Yes	186	2015-01-30	#NULL!	#NULL!	2		0	Yes	Yes	2004	Female	#NULL!	None	1	1	Asymptomatic	167	2014-06-12	187	2015-08-21	14	UNDETECTABLE	42261	UNDETECTABLE	42261	Routine Viral load	TDF + 3TC + EFV .	25/06/2014	TDF,3TC,EFV	25/06/2014	NONE	30.7	No signs or symptoms	None	None		YES	CTX	NONE	YES	No	None
08:00:00 PM	51.3	Negative	53.3	Positive				92	2014-06-13	75	2014-01-07	1		0		Yes	2013	male	#NULL!	Cancer/malignancy, chronic wound, Diabetes,	4	4	KS Cutaneous	161	2013-12-16	92	2014-06-13	5	75 COPIES	41673	75	41673	Preconception	TDF + 3TC + EFV .	16/12/2013	TDF,3TC,EFV	16/12/2013	NONE	27.3	suspected TB.	Deceased	None		YES	CTX	NONE	NO	No	None
11:00:00 AM	23.6	Positive	41.4	Negative				21	2014-01-31	#NULL!	#NULL!	3		0		Yes	2014	Female	#NULL!	None	1	4	Cryptococal meningitis 2013	21	2014-01-31	21	2014-01-31	#NULL!	NONE		NONE		NONE	TDF + 3TC + EFV .	41701	TDF,3TC,EFV	41701	NONE	21.1	No signs or symptoms	None	None		YES	Fluconazole/CTX	cryptococcal meningitis	NO	No	None
11:00:00 PM	31.6	Negative	37	Positive				22	2014-06-05	#NULL!	#NULL!	1		0		Yes	2014	male	#NULL!	chonic diarrhoea	3	3	Moderate malnutrition / Weight loss > 10%	22	2014-06-05	22	2014-06-05	#NULL!	NONE		NONE		NONE	TDF + 3TC + EFV .	19/06/2014	TDF,3TC,EFV	19/06/2014	NONE	17.2	Suspected TB.	Deceased	None		YES	CTX	NONE	NO	No	None
09:00:00 PM	28	Positive	#NULL!	Negative				331	2013-10-30	#NULL!	#NULL!	0		0	Yes	Yes	2013	Female	#NULL!	NoNE	1	1	Asymptomatic	331	2013-10-30	331	2013-10-30	#NULL!	NONE		NONE		NONE	OI Medicines		CTX		NONE	20.9	No signs or symptoms	None	IMPLANT	41591	YES	CTX	NONE	NO	No	None
06:00:00 AM	#NULL!	Negative	37.1	Positive				389	2013-11-06	#NULL!	#NULL!	0		0		Yes	2013	male	#NULL!	None	#NULL!	#NULL!		389	2013-11-06	389	2013-11-06	#NULL!	NONE		NONE		NONE	OI Medicines		CTX		NONE	0	No Data.		None		YES	No Data(Decliner)
12:00:00 PM	39.3	Positive	51.3	Negative				#NULL!	#NULL!	#NULL!	#NULL!	0		0	Yes	Yes	2010	Female	#NULL!	None	2	2	Other WHO Stage II Condition	442	2014-06-18	442	2014-06-18	#NULL!	NONE		NONE		NONE	OI Medicines		CTX		NONE	21.5	No signs or symptoms	None	Bilateral Tubal ligation	41808	YES	CTX	NONE	NO	No	None
12:00:00 AM	28	Positive	28.3	Negative			Yes	581	2015-07-30	20	2015-08-25	7		0		Yes	2013	Female	2	Hypertension,	1	1	Asymptomatic	418	2013-11-26	516	2015-09-22	21	90 Copies	41785	UNDETECTABLE	42235	Routine Viral load	TDF + 3TC + NVP .	20/11/2013	TDF,3TC,NVP	20/11/2013	NONE	26.5	No signs or symptoms	None	None		YES	CTX	NONE	YES	No	None
11:00:00 PM	22	Negative	32	Positive			Yes	472	2015-08-03	20	2015-08-03	12		0		Yes	2014	male	5	none	1	1	Asymptomatic	437	2011-08-12	472	2015-08-03	47	UNDETECTABLE	42235	UNDETECTABLE	42083	Routine Viral load	TDF + 3TC + EFV .	40554	TDF,3TC,EFV	40554	none	21.6	No signs or symptoms	None	None		YES	Allergic to CTX	NONE	NO	No	None
09:00:00 AM	52.3	Negative	59.4	Positive			Yes	319	2015-04-13	#NULL!	#NULL!	12	Yes	12		Yes	2009	male	6	NoNE	2	2	Angular chelitis	177	2013-05-27	49	2015-10-15	28	NONE		NONE		NONE	AZT+3TC+NVP	27/05/2013	AZT,3TC,NVP	13/06/2013	NONE	23.2	No signs or symptoms	None	None		YES	CTX	PCP, CTX	NO	Yes	Finished Dosage
03:00:00 AM	33.6	Positive	31.6	Negative				353	2015-05-15	20	2015-06-12	56		0	Yes	Yes	2005	Female	12	TB	4	4	Invasive Ca Cx 2012	332	2013-07-08	452	2015-10-26	27	UNDETECTABLE	26.06.2015	UNDETECTABLE	26.06.2015	Routine Viral load	TDF + 3TC + EFV .	41493	TDF,3TC,EFV	41493	NONE	22.4	No signs or symptoms	None	Implant	41674	YES	CTX	NONE	NO	NO	None
12:00:00 PM	19.6	Negative	27.8	Positive			Yes	583	2015-03-06	#NULL!	#NULL!	8		0		Yes	2011	male	4	Hypertension	1	1	Asymptomatic	476	2013-07-18	622	2015-10-23	27	NONE		NONE		NONE	TDF + 3TC + EFV .	41617	TDF,3TC,EFV	41617	NONE	22.7	No signs or symptoms	None	None		YES	CTX	NONE	YES	NO	None
12:00:00 PM	33.3	Positive	#NULL!	Negative			Yes	692	2015-03-12	#NULL!	#NULL!	5		0		Yes	2013	Female	#NULL!	Hypertension,	1	1	Asymptomatic	547	2013-07-18	591	2015-09-18	26	NONE		NONE		NONE	OI Medicines		CTX		NONE	28	No signs or symptoms	None	None		no	CTX	NONE	YES	NO	None
05:00:00 PM	29.4	Negative	46.3	Positive				346	2015-05-06	20	2015-05-06	6		0		Yes	2013	male	#NULL!	Psoriasis, Hypertension,TB/ATHRITIS	1	3	Pulmonary TB Smear.	218	2013-07-22	346	2015-05-06	21	UNDETECTABLE	42146	UNDETECTABLE	42146	Routine Viral load	TDF + 3TC + EFV .	41463	TDF,3TC,EFV	41463	NONE	32.6	completed TB medications	(April 2014)Completed Treatment	None		YES	CTX	TB	NO	NO	None
07:00:00 PM	42.5	Positive	39.3	Negative				334	2015-07-30	90	2014-07-23	42		0	Yes	Yes	2013	Female	#NULL!	MYALGIA,	3	3	Oral Candidiasis Thrush/meningitis Apr 2013	302	2013-07-25	341	2015-09-17	25	90 Copies	41842	90	41842	Routine Viral load	TDF + 3TC + EFV .	24/07/2013	TDF,3TC,EFV	24/07/2013	NONE	27.8	No signs or symptoms	None	None		YES	CTX	NONE	NO	NO	None
04:00:00 AM	40.3	Positive	#NULL!	Negative				312	2015-02-09	#NULL!	#NULL!	11		0		Yes	2013	Female	#NULL!	Fibroids/Diabetes/TB	3	3	Pulmonary TB Smear +	252	2013-08-06	418	2015-09-14	25	UNDETECTABLE	20.Mrch.2015	UNDETECTABLE	20.Mrch.2015	Routine Viral load	TDF + 3TC + EFV .	24/04/2014	TDF,3TC,EFV	24/04/2014	NONE	25.5	completed TB medications	(15.Feb.2015)completed treatment	None		YES	CTX	TB	NO	NO	None
06:00:00 PM	34.9	Positive	#NULL!	Negative			Yes	584	2015-04-18	90	2014-04-04	35		0	Yes	Yes	2007	Female	9	NoNE	1	1	Asymptomatic	592	2013-09-10	521	2015-08-31	23	90 Copies	41733	90	41733	Routine Viral load	AZT+3TC+NVP .	41556	AZT,3TC,NVP	41556	NONE	26.3	No signs or symptoms	None	Injectible	30/5/2014	YES	CTX	NONE	YES	No	None
07:00:00 PM	47	Positive	49.1	Negative				829	2015-07-10	90	2014-06-10	13	Yes	13		Yes	2008	Female	18	AMOEBIASIS/HYPERACIDITY	1	1	Asymptomatic	1052	2013-09-10	1147	2015-09-28	24	90 Copies	41830	90	41830	Routine Viral load	AZT+3TC+NVP .	41617	AZT,3TC,NVP	41617	NONE	26.1	No signs or symptoms	None	None		YES	CTX	NONE	NO	YES	had travelled
01:00:00 AM	32.2	Positive	32.7	Negative			Yes	736	2014-12-24	90	2014-03-18	126	Yes	126	Yes	Yes	2009	Female	#NULL!	spondylits	2	2	skin manifestation	312	2013-09-16	736	2014-12-24	15	90 Copies	41715	90	41715	Routine Viral load	TDF + 3TC + EFV .	17/09/2013	TDF,3TC,EFV	17/09/2013	NONE	26.3	No signs or symptoms	None	Injectible	41738	YES	CTX	NONE	YES	Yes	None
05:00:00 AM	#NULL!	Negative	37.5	Positive			Yes	579	2015-04-14	#NULL!	#NULL!	7	Yes	7		Yes	2008	male	#NULL!	ORAL SORES,	1	1	Asymptomatic	467	2013-09-20	579	2015-04-14	18	NONE		NONE		NONE	TDF + 3TC + EFV .	22/01/2014	TDF,3TC,EFV	22/01/2014	NONE	21.8	No signs or symptoms	None	None		YES	CTX	NONE	NO	YES	None
01:00:00 PM	43.1	Positive	#NULL!	Negative			Yes	335	2015-04-27	20	2014-11-05	8		0		Yes	2013	Female	#NULL!	NoNE	1	1	Asymptomatic	81	2013-10-22	335	2015-04-27	18	<20 copies	05.11.2014	UNDETECTABLE	05.11.2014	Routine Viral load	TDF + 3TC + EFV .	29/10/2013	TDF,3TC,EFV	29/10/2013	NONE	25.4	No signs or symptoms	None	None		YES	CTX	NONE	YES	No	None
06:00:00 PM	#NULL!	Negative	34.3	Positive			Yes	985	2015-01-06	#NULL!	#NULL!	10		0		Yes	2013	male	5	None	1	1	Asymptomatic	507	2013-11-20	665	2015-07-10	19	UNDETECTABLE	28.07.2015	UNDETECTABLE	28.07.2015	Routine Viral load	TDF + 3TC + EFV .	20/11/2013	TDF,3TC,EFV	20/11/2013	NONE	23.4	No signs or symptoms	None	None		YES	CTX	NONE	NO	No	None
09:00:00 PM	39.4	Positive	#NULL!	Negative				766	2015-06-18	20	2015-06-19	72		0	Yes	Yes	2006	Female	15	None	1	2	Recurrent oral ulceration	656	2014-01-10	766	2015-06-19	17	UNDETECTABLE	42184	UNDETECTABLE	42184	Routine Viral load	AZT + 3TC + EFV .	16/01/2014	AZT,3TC,EFV	16/01/2014	NONE	32.2	No signs or symptoms	None	Hormonal Contraceptives	42062	no	CTX	NONE	NO	No	None
02:00:00 AM	28.3	Negative	45.9	Positive		Secondary		219	2015-05-26	214	2014-02-12	7		0		Yes	2004	male	13	SCROTAL fungal	3	3	Oral Candidiasis Thrush	196	2014-02-05	261	2015-11-16	21	68682	41434	UNDETECTABLE	42213	Treatment Failure.	AZT + 3TC + LPV/r .	15/01/2014	AZT,3TC,LPV/r	15/01/2014	NONE	24.1	No signs or symptoms	None	None		YES	CTX	NONE	NO	No	None
08:00:00 AM	29	Positive	#NULL!	Negative				536	2015-04-29	#NULL!	#NULL!	84	Yes	84	Yes	Yes	2014	Female	#NULL!	menorrhagia, ALLERGIC DERMATITIS	1	1	Asymptomatic	198	2014-01-28	413	2015-10-27	20	NONE		NONE		NONE	TDF + 3TC + EFV .	21/01/2014	TDF,3TC,EFV	21/01/2014	NONE	25.5	No signs or symptoms	None	IMPLANT	41682	YES	CTX	NONE	NO	Yes	Side effects.
10:00:00 AM	32.1	Positive	39.3	Negative				465	2015-05-11	#NULL!	#NULL!	10	Yes	10	Yes	Yes	2004	Female	10	stevene johnson syndrome	3	3	weight loss >10%	272	2014-04-01	465	2015-05-11	13	NONE		NONE		NONE	TDF + 3TC + EFV .	30/05/2014	TDF,3TC,EFV	30/05/2014	NONE	17.5	No signs or symptoms	None	Implant	41782	YES	Allergic to CTX	johnson syndrome	NO	Yes	Pill Burden
05:00:00 PM	47.9	Negative	50.8	Positive				209	2014-12-22	#NULL!	#NULL!	2		0		Yes	2014	male	21	TB/ANAEMIA/PUD/ATHRALGIA	3	3	Pulmonary TB Smear +	134	2014-06-23	619	2015-07-07	12	NONE		NONE		NONE	TDF + 3TC + EFV .	28/07/2014	TDF,3TC,EFV	28/07/2014	NONE	18.9	Completed TB Treatment	41981	None		no	CTX	TB	NO	No	None
11:00:00 PM	34.8	Negative	47.8	Positive		Primary	Yes	239	2015-06-16	94	2015-04-10	4		0		Yes	2006	male	26	none	2	2	Weight loss < 10%	93	2006-05-03	239	2015-06-15	109	417 Copies	41417	94	42110	Routine Viral load	TDF + 3TC + NVP .	14/10/2009	TDF,3TC,NVP	14/10/2009	NONE	19.6	No signs or symptoms	None	None		YES	Dapsone	NONE	NO	No	None
01:00:00 PM	30.3	Positive	29.4	Negative			Yes	897	2015-07-21	90	2014-02-21	8		0	Yes	Yes	2010	Female	#NULL!	NoNE	1	2	reccurent URTI	631	2013-05-07	897	2015-07-24	26	90 Copies	41691	90	41691	Routine Viral load	TDF + 3TC + EFV	41460	TDF,3TC,EFV	41460	NONE	25.8	No signs or symptoms	None	None		YES	CTX	NONE	YES	NO	None
12:00:00 AM	33.5	Positive	36	Negative			Yes	1128	2015-04-10	90	2014-03-06	35		0	Yes	Yes	2007	Female	14	VAG CANDIDIASIS CONJUCTIVITIS,	1	2	reccurent oral ulceration	790	2013-04-01	1123	2015-04-10	24	90 Copies	41764	90	41764	Routine Viral load	TDF + 3TC + EFV .	13/11/2013	TDF,3TC,EFV	13/11/2013	NONE	28.8	No signs or symptoms	None	None		YES	CTX	NONE	YES	NO	None
04:00:00 AM	29.7	Positive	35.9	Negative			Yes	712	2014-12-29	20	2014-11-14	10		0		Yes	2006	Female	7	NoNE	1	1	Minor skin manifestation	716	2013-07-09	712	2014-12-29	17	UNDETECTABLE	14.11.2014	UNDETECTABLE	16.12.2014	Routine Viral load	TDF + 3TC + EFV .	41524	TDF,3TC,EFV	41524	NONE	25	No signs or symptoms	None	None		YES	CTX	NONE	YES	NO	None
12:00:00 AM	31.6	Positive	36	Negative			Yes	527	2015-07-30	40	2014-04-30	99		0	Yes	Yes	2004	Female	12	NoNE	1	1	Asymptomatic	658	2011-11-15	527	2015-07-30	44	<40 copies	19.03.2014	40	19.03.2014	Routine Viral load	TDF + 3TC + EFV .	41284	TDF,3TC,EFV	41284	NONE	25.6	No signs or symptoms	None	implant	42273	YES	CTX	NONE	YES	No	None
01:00:00 AM	29.9	Positive	28.3	Negative			Yes	581	2015-07-24	20	2014-04-11	9		0	Yes	Yes	2011	Female	6	NoNE	1	1	Asymptomatic	588	2013-08-26	581	2015-07-24	22	UNDETECTABLE	41675	UNDETECTABLE	41675	Routine Viral load	AZT + 3TC + EFV .	23/08/2013	AZT,3TC,EFV	23/08/2013	NONE	31.1	No signs or symptoms	None	None		YES	CTX	NONE	YES	No	None
05:00:00 AM	22.1	Positive	#NULL!	Negative			Yes	710	2015-03-27	#NULL!	#NULL!	3		0		Yes	2013	Female	3	NoNE	1	1	Asymptomatic	866	2013-08-27	1373	2015-10-23	25	NONE		NONE		NONE	TDF + 3TC + EFV .	31/03/2014	TDF,3TC,EFV	31/03/2014	NONE	23	No signs or symptoms	None	None		YES	CTX	NONE	YES	No	None
10:00:00 PM	30.8	Positive	39.3	Negative			Yes	1066	2015-08-10	20	2014-03-31	48		0	Yes	Yes	2010	Female	10	PUD 2009,TRICHOMONIASIS UTI,	2	2	skin manifestation/? Allergy to sulphur	727	2013-09-13	1066	2015-08-10	22	UNDETECTABLE	31.03.2014	UNDETECTABLE	31.03.2014	Routine Viral load	TDF + 3TC + EFV .	13/09/2013	TDF,3TC,EFV	13/09/2013	NONE	25	No signs or symptoms	None	Injectible	41822	YES	CTX	NONE	YES	No	None
06:00:00 PM	36.8	Positive	42.5	Negative			Yes	343	2015-08-06	#NULL!	#NULL!	9		0		Yes	2005	Female	16	lipodystrophy due to d4T stopped in 2010,TB	3	3	not indicated in transfer letter	17	2005-12-19	343	2015-08-06	115	UNDETECTABLE	41291	UNDETECTABLE	41656	Routine Viral load	TDF + 3TC + NVP .	41343	TDF,3TC,NVP	41343	NONE	22.6	No signs or symptoms	None	None		YES	CTX	NONE	YES	No	None
05:00:00 AM	27.3	Positive	28.3	Negative			Yes	90	2015-04-16	#NULL!	#NULL!	10		0		Yes	2013	Female	#NULL!	NoNE	2	2	Weight Loss <10%	37	2013-10-14	92	2015-09-16	23	26122 copies	41761	26122	41761	Routine Viral load	TDF + 3TC + EFV .	41436	TDF,3TC,EFV	41436	NONE	24.6	No signs or symptoms	None	PREGNANT(7 MONTHS )/17.Aug.2015		YES	CTX	NONE	YES	No	None
10:00:00 PM	32	Positive	28.3	Negative			Yes	704	2015-03-26	#NULL!	#NULL!	5		0		Yes	2009	Female	#NULL!	NoNE	1	1	Asymptomatic	199	2013-10-30	608	2015-09-17	22	NONE		NONE		NONE	TDF + 3TC + NVP .	31/10/2013	TDF,3TC,NVP	31/10/2013	NONE	18.7	No signs or symptoms	None	None		YES	CTX	NONE	YES	No	None
11:00:00 AM	30.8	Positive	30.5	Negative			Yes	933	2015-06-29	20	2015-08-19	8		0	Yes	Yes	2013	Female	#NULL!	Eczema	1	2	Minor skin manifestation	536	2013-11-13	933	2015-06-29	19	UNDETECTABLE	42235	UNDETECTABLE	42235	Routine Viral load	TDF + 3TC + EFV .	16/12/2013	TDF,3TC,EFV	16/12/2013	NONE	27.9	No signs or symptoms	None	None		YES	CTX	NONE	YES	No	None
04:00:00 AM	27.3	Positive	#NULL!	Negative			Yes	517	2013-12-24	#NULL!	#NULL!	0		0		Yes	2004	Female	20	Myalgia/CERVICITIS/DVT/TB	2	2	Herpes zoster	548	2014-01-07	735	2015-08-14	19	90 Copies	41814	90	41814	Routine Viral load	AZT+3TC+NVP .	41821	AZT, 3TC, NVP	41821	NONE	31.2	No signs or symptoms	None	Implant	41758	YES	CTX	NONE	YES	Yes	Forgot
05:00:00 AM	23.9	Negative	42.6	Positive			Yes	518	2015-05-28	#NULL!	#NULL!	4	Yes	4		Yes	2014	male	#NULL!	None	2	2	Weight Loss	590	2014-02-11	518	2015-05-28	15	NONE		NONE		NONE	TDF + 3TC + EFV .	25/02/2014	TDF,3TC,EFV	25/02/2014	NONE	22.8	No signs or symptoms	None	None		YES	CTX	NONE	NO	Yes	None
11:00:00 AM	27.8	Positive	26.2	Negative			Yes	450	2014-04-30	#NULL!	#NULL!	5		0		Yes	2014	Female	#NULL!	none	2	2	Minor skin manifestation	450	2014-04-30	450	2014-04-30	#NULL!	NONE		NONE		NONE	TDF + 3TC + EFV .	41764	TDF,3TC,EFV	41764	NONE	32.4	No signs or symptoms	None	None		YES	CTX	NONE	YES	No	None
11:00:00 AM	32.2	Positive	27.3	Negative			Yes	221	2015-02-09	#NULL!	#NULL!	5		0		Yes	2014	Female	8	None	1	1	Asymptomatic	176	2014-07-11	221	2015-02-09	6	NONE		NONE		NONE	TDF + 3TC + EFV .	25/07/2014	TDF,3TC,EFV	25/07/2014	NONE	27.9	No signs or symptoms	None	None		YES	CTX	NONE	YES	No	None
04:00:00 PM	34.4	Positive	#NULL!	Negative			Yes	427	2015-05-11	20	2015-03-11	9		0		Yes	2009	Female	10	none	1	2	Recurrent URTI	200	2014-09-12	376	2015-10-01	12	UNDETECTABLE	42068	UNDETECTABLE	42068	Routine Viral load	TDF + 3TC + EFV .	29/09/2014	TDF,3TC,EFV	29/09/2014	NONE	31.2	No signs or symptoms	None	Pregnant	42135	YES	CTX	NONE	YES	No	None
06:00:00 AM	33.8	Negative	35.7	Positive			Yes	308	2015-01-14	#NULL!	#NULL!	2		0		Yes	2015	male	12	none	1	1	Asymptomatic	308	2015-01-14	520	2015-07-08	5	NONE		NONE		NONE	TDF + 3TC + EFV .	28/01/2015	TDF,3TC,EFV	28/01/2015	none	30.5	No signs or symptoms	None	None		yes	CTX	NONE	NO	No	None
01:00:00 AM	30.9	Positive	28.3	Negative			Yes	713	2015-08-04	#NULL!	#NULL!	1		0		Yes	2014	Female	4	none	1	1	Asymptomatic	657	2015-02-02	713	2015-08-04	6	NONE		NONE		NONE	TDF + 3TC + EFV .	42279	TDF,3TC,EFV	42279	none	29.7	No signs or symptoms	None	None		yes	CTX	NONE	YES	No	None
09:00:00 AM	33.3	Positive	35.9	Negative			Yes	273	2015-08-11	20	2015-07-28	3		0		Yes	2015	Female	10	none	1	1	Asymptomatic	240	2015-01-27	332	2015-02-26	#NULL!	NONE		NONE		NONE	TDF + 3TC + EFV .	17/02/2015	TDF,3TC,EFV	17/02/2015	none	20.4	No signs or symptoms	None	None		yes	CTX	NONE	YES	No	None
03:00:00 PM	28.3	Negative	34.2	Positive			Yes	109	2015-08-05	#NULL!	#NULL!	1		0		Yes	2015	male	#NULL!	none	2	2	Recurrent URTI	161	2015-02-16	109	2015-08-05	5	NONE		NONE		NONE	TDF + 3TC + NVP .	16/02/2015	TDF,3TC,NVP	16/02/2015	none	21.3	No signs or symptoms	None	None		yes	CTX	NONE	NO	No	None
02:00:00 AM	33.1	Positive	28	Negative			Yes	496	2015-09-03	#NULL!	#NULL!	0		0		Yes	2014	Female	15	none	1	1	Asymptomatic	748	2014-12-11	660	2015-09-17	9	NONE		NONE		NONE	TDF + 3TC + NVP .	21/07/2015	TDF,3TC,EFV	21/07/2015	none	24.7	No signs or symptoms	None	PREGNANT		yes	CTX	NONE	YES	No	None
03:00:00 PM	43.8	Positive	45.8	Negative	College/University		Yes	686	2015-08-27	#NULL!	#NULL!	0		0		Yes	2010	Female	3	ARTHRITIS/MENINGITIS	3	3	Extrapulmonary Cryptococcosis	694	2010-10-18	686	2015-08-27	58	UNDETECTABLE	42261	UNDETECTABLE	42261	Routine Viral load	AZT + 3TC + LPV/r .	40188	AZT,3TC,LPV/r	40188	none	32	No signs or symptoms	None	None		yes	Fluconazole	NONE	YES	No	None
03:00:00 PM	50.1	Positive	41.4	Negative			Yes	637	2015-05-12	90	2014-06-27	11		0		Yes	2006	Female	15	Hypertension, ATHRITIS	1	2	reccurent URTI	550	2013-05-10	637	2015-05-12	24	90 Copies	41817	90	41817	Routine Viral load	TDF + 3TC + EFV	24/12/2013	TDF,3TC,EFV	41632	NONE	25.4	No signs or symptoms	None	None		YES	CTX	NONE	YES	NO	None
07:00:00 PM	41.4	Negative	38.7	Positive			Yes	531	2015-05-21	#NULL!	#NULL!	5		0		Yes	2010	male	10	ATHRALGIA, Allergic to Sulphur	1	1	Asymptomatic	345	2013-06-11	531	2015-05-21	23	NONE		NONE		NONE	TDF + 3TC + EFV	25/06/2013	TDF,3TC,EFV	25/06/2013	NONE	28.7	No signs or symptoms	None	None		YES	(Allergic to sulphur)	NONE	YES	NO	None
10:00:00 AM	28.5	Positive	33.8	Negative				650	2013-06-21	#NULL!	#NULL!	0		0			2010	Female	#NULL!	NoNE	2	2	Weight Loss	650	2013-06-21	650	2013-06-21	#NULL!	NONE		NONE		NONE	OI Medicines		CTX		NONE	28.1	No signs or symptoms	None	None		YES	CTX	NONE	NO	NO	None
10:00:00 AM	35.3	Positive	35.9	Negative			Yes	1031	2015-08-27	#NULL!	#NULL!	18	Yes	18	Yes	Yes	2010	Female	15	NoNE	1	1	Asymptomatic	809	2013-07-19	1031	2015-08-27	25	UNDETECTABLE	42261	UNDETECTABLE	42261	Routine Viral load	TDF + 3TC + EFV .	13/10/2014	TDF,3TC,EFV	13/10/2014	NONE	31.6	No signs or symptoms	None	injectible	41831	YES	CTX	NONE	YES	Yes	None
04:00:00 PM	41.4	Positive	40.3	Negative			Yes	636	2015-07-30	36409	2014-10-16	24		0	Yes	Yes	2007	Female	16	NoNE	2	2	Reccurent URTI	839	2013-06-28	636	2015-07-31	25	36409 Copies	16.10.2014	36409	16.10.2014	ART Initiation	TDF + 3TC + EFV .	27/01/2015	TDF,3TC,EFV	27/01/2015	NONE	23.6	No signs or symptoms	None	Injectable	41738	YES	CTX	NONE	YES	NO	None
09:00:00 PM	39.5	Positive	51.3	Negative				647	2015-08-19	90	2014-07-17	80		0	Yes	Yes	2009	Female	20	conjuctivitis, mastalgia, Mouth Ulcer,ORAL THRUSH	2	3	Oral candidiasis thrush	412	2013-07-02	647	2015-08-17	25	90 Copies	41837	90	41837	Routine Viral load	TDF + 3TC + EFV .	15/08/2013	TDF,3TC,EFV	15/08/2013	NONE	27.6	No signs or symptoms	None	Implant	42151	YES	CTX	NONE	NO	NO	None
07:00:00 AM	32.8	Positive	33.8	Negative			Yes	617	2015-05-28	90	2014-07-30	9	Yes	9		Yes	2010	Female	10	DYSMENORRHOEA	2	2	Minor skin manifestation/Recurrent URTI	479	2013-07-13	617	2015-05-28	22	90 Copies	41830	90	41830	Routine Viral load	TDF + 3TC + EFV .	41699	TDF,3TC,EFV	41699	NONE	21.4	No signs or symptoms	None	None		YES	CTX	NONE	YES	YES	Travelled
10:00:00 AM	35.9	Negative	51.5	Positive			Yes	488	2015-04-01	#NULL!	#NULL!	3		0		Yes	2001	male	5	PNEUMONIA R/O TB	2	2	Minor skin manifestation	517	2013-07-15	632	2015-09-30	26	NONE		NONE		NONE	TDF + 3TC + EFV .	22/10/2014	TDF,3TC,EFV	22/10/2014	NONE	23.6	No signs or symptoms	None	None		YES	Allergic to CTX	NONE	NO	NO	None
05:00:00 PM	31.1	Positive	32.7	Negative			Yes	491	2015-06-25	20	2014-10-13	80	Yes	80	Yes	Yes	2011	Female	11	NoNE	1	1	Asymptomatic	631	2013-02-27	491	2015-06-26	27	UNDETECTABLE	13.10.2014	UNDETECTABLE	13.10.2014	Preconception	TDF + 3TC + NVP .	22/07/2013	TDF,3TC,NVP	22/07/2013	NONE	26.7	No signs or symptoms	None	Injectable	41603	YES	CTX	NONE	YES	yes	Forgot
07:00:00 AM	27.3	Negative	36.5	Positive				637	2015-05-08	20	2015-05-08	7		0		Yes	2013	male	#NULL!	haematoma,	1	1	Asymptomatic	614	2013-08-06	637	2015-05-08	21	UNDETECTABLE	42146	UNDETECTABLE	42146	Routine Viral load	TDF + 3TC + EFV .	18/08/2014	TDF,3TC,EFV	18/08/2014	NONE	23.4	No signs or symptoms	None	None		YES	CTX	NONE	NO	NO	None
02:00:00 PM	27.3	Positive	28.8	Negative			Yes	1492	2015-08-04	20	2015-08-19	7		0		Yes	2011	male	4	NoNE	1	1	Asymptomatic	1094	2013-08-12	1492	2015-08-04	23	UNDETECTABLE	42220	UNDETECTABLE	42220	Preconception	TDF + 3TC + EFV .	22/04/2014	TDF,3TC,EFV	22/04/2014	NONE	22.9	No signs or symptoms	None	None		YES	CTX	NONE	NO	YES	Finished Dosage
09:00:00 PM	50.3	Positive	47.9	Negative				610	2015-07-29	398	2015-08-19	99		0	Yes	Yes	2011	Female	20	chronic parotitis/ARTHRITIS	2	2	Reccurent URTI/parotid enlargement	460	2011-07-05	610	2015-07-29	48	90 Copies	41710	398	42235	Routine Viral load	TDF + 3TC + EFV .	41403	TDF,3TC,EFV	41403	NONE	24.7	No signs or symptoms	None	Bilateral Tubal ligation	42044	YES	CTX	NONE	NO	No	None
08:00:00 AM	34.8	Negative	39.4	Positive			Yes	308	2015-09-03	#NULL!	#NULL!	4		0		Yes	2008	male	9	GERD 2011hptn, Hypertension,	2	4	Chronic Herpes simplex > 1 month	69	2013-08-30	308	2015-09-03	24	UNDETECTABLE	42261	UNDETECTABLE	42261	Routine Viral load	TDF + 3TC + EFV .	41526	TDF,3TC,EFV	41526	NONE	29.7	No signs or symptoms	None	None		YES	CTX	NONE	NO	No	None
08:00:00 AM	32.1	Positive	26.2	Negative			Yes	828	2013-08-30	#NULL!	#NULL!	0		0			2011	Female	#NULL!	NoNE	1	1	Asymptomatic	828	2013-08-30	828	2013-08-30	#NULL!	NONE		NONE		NONE	AZT+3TC+NVP .	30/08/2013	AZT,3TC,NVP	30/08/2013	NONE	26.3	No signs or symptoms	None	None		YES	CTX	NONE	YES	No	None
01:00:00 AM	49	Positive	47.9	Negative			Yes	395	2015-04-14	90	2014-04-16	1		0		Yes	2013	Female	#NULL!	Asthma 2012	1	1	Asymptomatic	210	2013-09-17	463	2015-09-01	23	90 Copies	41744	90	41744	Routine Viral load	TDF + 3TC + EFV .	22/10/2013	TDF,3TC,EFV	22/10/2013	NONE	35.3	No signs or symptoms	None	None		YES	CTX	NONE	YES	No	None
12:00:00 PM	36	Negative	36.3	Positive				792	2015-07-27	#NULL!	#NULL!	6		0		Yes	2003	male	13	NoNE	2	2	Herpes Zoster 2009	568	2013-09-29	792	2015-07-27	21	UNDETECTABLE	28.07.2015	UNDETECTABLE	28.07.2015	Routine Viral load	AZT+3TC+NVP .	27/09/2013	AZT,3TC,NVP	27/09/2013	NONE	22.9	No signs or symptoms	None	None		YES	CTX	NONE	NO	No	None
12:00:00 PM	31.5	Positive	35.9	Negative			Yes	612	2013-09-30	#NULL!	#NULL!	0		0			2013	Female	#NULL!	Asthma 1976	1	1	Asymptomatic	612	2013-09-30	612	2013-09-30	#NULL!	NONE		NONE		NONE	AZT + 3TC + EFV .	27/09/2013	AZT,3TC,EFV	27/09/2013	NONE	0	No signs or symptoms	None	None		YES	CTX	NONE	YES	No	None
05:00:00 PM	33.8	Negative	32.4	Positive			Yes	523	2015-06-22	20	2015-06-22	7		0		Yes	2013	male	#NULL!	NoNE	1	1	Asymptomatic	292	2013-10-02	523	2015-06-22	20	UNDETECTABLE	42184	UNDETECTABLE	42184	Routine Viral load	TDF + 3TC + EFV .	23/10/2013	TDF,3TC,EFV	23/10/2013	NONE	22.2	No signs or symptoms	None	None		YES	CTX	NONE	NO	No	None
11:00:00 PM	24	Negative	27.3	Positive				87	2014-05-30	#NULL!	#NULL!	10		0		Yes	2013	male	9	NoNE	1	1	Asymptomatic	94	2013-10-08	321	2015-09-16	23	NONE		NONE		NONE	TDF + 3TC + EFV .	41375	TDF,3TC,EFV	41375	NONE	22.2	No signs or symptoms	None	None		YES	CTX	NONE	NO	No	None
06:00:00 AM	43.6	Negative	42.8	Positive				894	2015-07-22	#NULL!	#NULL!	1		0		Yes	2013	male	15	NoNE	2	2	minor skin manifestation/Parotid enlargement	313	2013-10-15	709	2015-10-14	23	NONE		NONE		NONE	TDF + 3TC + EFV .	41619	TDF,3TC,EFV	41619	NONE	24.7	No signs or symptoms	None	None		YES	CTX	NONE	NO	No	None
01:00:00 PM	32.7	Negative	54.3	Positive				516	2015-10-05	#NULL!	#NULL!	6		0		Yes	2010	male	20	ASTHMA/URTI/asthamatic	1	1	Asymptomatic	430	2013-10-22	516	2015-10-05	23	NONE		NONE		NONE	TDF + 3TC + EFV .	41589	TDF,3TC,EFV	41589	NONE	25.1	No signs or symptoms	None	None		YES	CTX	NONE	NO	No	None
08:00:00 PM	31.3	Positive	35.9	Negative				1286	2015-08-20	90	2014-07-24	51		0	Yes	Yes	2013	Female	15	NoNE	1	1	Asymptomatic	681	2013-10-29	1286	2015-08-20	21	90 Copies	41844	90	41844	Routine Viral load	TDF + 3TC + EFV .	18/02/2014	TDF,3TC,EFV	18/02/2014	NONE	31.7	No signs or symptoms	None	Injectible	42121	YES	CTX	NONE	NO	No	None
02:00:00 AM	37.3	Positive	36	Negative			Yes	662	2015-06-08	#NULL!	#NULL!	16		0	Yes	Yes	2013	Female	13	Hypertension,	1	1	Asymptomatic	862	2013-11-11	662	2015-06-08	18	UNDETECTABLE	42184	UNDETECTABLE	42184	Routine Viral load	TDF + 3TC + NVP .	41589	TDF,3TC,NVP	41589	NONE	26.3	No signs or symptoms	None	Injectible	42275	YES	CTX	NONE	YES	No	None
09:00:00 AM	35.1	Positive	32.7	Negative			Yes	394	2015-05-22	#NULL!	#NULL!	4		0		Yes	2013	Female	3	Hypertension,	1	1	Asymptomatic	119	2013-12-06	394	2015-05-22	17	NONE		NONE		NONE	TDF + 3TC + EFV .	41406	TDF,3TC,EFV	41406	NONE	26.3	No signs or symptoms	None	None		YES	CTX	NONE	YES	No	None
10:00:00 PM	36.5	Positive	35.9	Negative			Yes	727	2015-05-13	90	2014-07-21	16		0		Yes	2013	Female	15	Hypertension,	2	2	Reccurent URTI	463	2013-12-18	727	2015-05-14	16	90 Copies	41646	90	41646	Routine Viral load	TDF + 3TC + EFV .	18/12/2013	TDF,3TC,EFV	18/12/2013	NONE	27.9	No signs or symptoms	None	None		YES	CTX	NONE	YES	No	None
06:00:00 PM	50.3	Positive	43.6	Negative			Yes	735	2015-08-14	90	2014-09-18	44	Yes	44	Yes	Yes	2006	male	15	colitis urti, RHINITIS, HTN	2	2	minor skin manifestation	614	2014-01-07	740	2015-07-28	18	UNDETECTABLE	42217	UNDETECTABLE	42217	Preconception	AZT+3TC+NVP .	41792	AZT,3TC,NVP	41792	NONE	27.9	No signs or symptoms	None	None		YES	CTX	NONE	YES	No	None
12:00:00 PM	35.9	Negative	55.3	Positive				258	2015-04-29	20	2015-04-29	3		0		Yes	2014	male	#NULL!	HTN, Hypertension,	4	4	EPTB	318	2014-02-18	295	2015-10-29	20	UNDETECTABLE	42146	UNDETECTABLE	42146	Routine Viral load	d4T + 3TC + NVP .	19/11/2013	AZT,3TC,NVP	18/03/2014	NONE	19.3	No signs or symptoms	None	None		YES	CTX	NONE	NO	No	None
03:00:00 PM	40.3	Negative	55.3	Positive				#NULL!	#NULL!	#NULL!	#NULL!	0		0		Yes	2013	male	#NULL!	None	1	1	Asymptomatic	#NULL!	#NULL!	#NULL!	#NULL!	#NULL!	NONE		NONE		NONE	AZT+3TC+NVP .	21/02/2014	AZT,3TC,NVP	21/02/2014	NONE	22.4	No signs or symptoms	None	None		YES	CTX	NONE	NO	No	None
08:00:00 PM	52.3	Negative	61.3	Positive			Yes	538	2015-02-02	20	2015-02-02	4	Yes	4		Yes	2014	male	35	None	4	4	Other WHO stage 4 conditions	571	2014-02-28	694	2015-10-26	19	32030 copies	41698	UNDETECTABLE	42083	Preconception	TDF + 3TC + EFV .	28/03/2014	TDF,3TC,EFV	28/03/2014	NONE	26.2	No signs or symptoms	None	None		YES	CTX	NONE	NO	yes	Forgot
08:00:00 AM	34.7	Positive	42.5	Negative			Yes	610	2015-03-31	90	2014-03-24	15		0		Yes	2008	Female	#NULL!	rhinitis 2014	1	1	Asymptomatic	402	2014-03-10	813	2015-10-19	19	90 Copies	41722	90	41722	Routine Viral load	TDF + 3TC + NVP .	41915	TDF,3TC,NVP	41915	NONE	23.2	No signs or symptoms	None	None		no	CTX	NONE	YES	No	None
05:00:00 PM	31.9	Positive	31.6	Negative			Yes	757	2014-03-19	#NULL!	#NULL!	0		0		Yes	2013	Female	3	None	1	2	Minor skin manifestation	757	2014-03-19	757	2014-03-19	#NULL!	NONE		NONE		NONE	TDF + 3TC + NVP .	19/03/2014	TDF,3TC,NVP	19/03/2014	NONE	24.8	No signs or symptoms	None	None		YES	CTX	NONE	NO	No	None
11:00:00 PM	35.7	Positive	43.6	Negative			Yes	130	2015-07-20	#NULL!	#NULL!	2		0	Yes	Yes	2014	Female	14	abdominal hernia, HERNIA, arthritis	1	1	Asymptomatic	97	2014-03-25	130	2015-07-20	15	UNDETECTABLE	28.07.2015	UNDETECTABLE	28.07.2015	Routine Viral load	TDF + 3TC + EFV .	31/03/2014	TDF,3TC,EFV	31/03/2014	NONE	30.5	No signs or symptoms	None	Bilateral Tubal ligation	41723	YES	CTX	NONE	YES	No	None
06:00:00 AM	47.9	Negative	50.2	Positive				324	2015-01-29	20	2015-01-29	2		0		Yes	2014	male	30	AMOEBIASIS	1	1	Asymptomatic	355	2014-06-05	330	2015-10-23	16	UNDETECTABLE	42083	UNDETECTABLE	42083	Routine Viral load	TDF + 3TC + EFV .	25/04/2014	TDF,3TC,EFV	25/04/2014	NONE	24.1	No signs or symptoms	None	None		YES	CTX	NONE	NO	No	None
05:00:00 PM	35.2	Positive	41.4	Negative				396	2015-01-02	20	2014-12-04	2		0	Yes	Yes	2006	Female	9	None	1	1	Asymptomatic	342	2014-05-31	469	2015-10-08	16	UNDETECTABLE	16.12.2014	UNDETECTABLE	16.12.2014	Routine Viral load	TDF + 3TC + NVP .	30/05/2014	TDF,3TC,NVP	30/05/2014	NONE	21	No signs or symptoms	None	Injectible	42055	YES	CTX	NONE	NO	No	None
10:00:00 AM	47.3	Positive	38.2	Negative				347	2015-01-09	40	2013-04-10	6		0		Yes	2010	Female	4	None	3	4	Ct scan shows Tbm(19.01.15)	438	2009-07-28	716	2015-08-28	73	NONE		NONE		NONE	AZT+3TC+NVP .	41643	AZT,3TC,NVP	41643	NONE	21.99	No signs or symptoms	None	None		YES	CTX	NONE	NO	No	None
11:00:00 AM	28.1	Positive	32.7	Negative	College/University		Yes	981	2015-08-07	#NULL!	#NULL!	6		0		Yes	2011	Female	2	HELMINITHIASIS	1	1	Asymptomatic	932	2012-10-13	981	2015-08-07	33	2919 copies	41835	2919	41835	Routine Viral load	TDF + 3TC + EFV .	41889	TDF,3TC,EFV	41889	vomitting, dizziness, headcahe.nausea,	29.6	No signs or symptoms	None	None		YES	CTX	NONE	YES	No	None
11:00:00 AM	30.9	Positive	43.6	Negative			Yes	456	2015-08-12	20	2015-02-10	3		0		Yes	2014	Female	5	None	1	1	Asymptomatic	229	2014-06-17	456	2015-08-12	13	UNDETECTABLE	42083	UNDETECTABLE	42083	Routine Viral load	TDF + 3TC + EFV .	17/06/2014	TDF,3TC,EFV	17/06/2014	NONE	37.7	No signs or symptoms	None	None		YES	CTX	NONE	YES	No	None
08:00:00 AM	41.4	Positive	45.8	Negative				387	2015-08-18	#NULL!	#NULL!	6		0	Yes	Yes	2010	Female	18	ARTHRITIS/URTI	3	3	Pneumonia	307	2014-07-08	387	2015-08-18	13	NONE		NONE		NONE	TDF + 3TC + LPV/r .	41858	TDF,3TC,LVP/r	41858	NONE	18.6	No signs or symptoms	None	Injectible	42059	YES	CTX	NONE	NO	No	None
04:00:00 PM	20.9	Positive	27.3	Negative			Yes	712	2015-08-05	#NULL!	#NULL!	3		0		Yes	2014	Female	1	None	1	1	Asymptomatic	251	2014-07-16	712	2015-08-05	12	648421 copies	41843	648421	41843	Routine Viral load	TDF + 3TC + EFV .	30/07/2014	TDF,3TC,EFV	30/07/2014	NONE	26.1	No signs or symptoms	None	None		YES	CTX	NONE	YES	No	None
12:00:00 AM	35.3	Positive	45.8	Negative				306	2015-08-11	1354	2015-06-16	4		0		Yes	2007	Female	10	HEARTBURN/SPONDYLITIS	2	2	Herpes zoster	583	2011-07-28	306	2015-08-11	48	5675 Copies	39874	1354	42181	Preconception	TDF + 3TC + EFV .	41282	TDF,3TC,EFV	41282	NONE	25.21	No signs or symptoms	None	None		YES	CTX	NONE	NO	No	None
01:00:00 AM	25.3	Positive	38.2	Negative			Yes	395	2015-07-21	20	2015-03-02	12		0	Yes	Yes	2014	Female	4	none	1	1	Asymptomatic	455	2014-08-08	396	2015-07-21	11	UNDETECTABLE	42083	UNDETECTABLE	42083	Routine Viral load	TDF + 3TC + EFV .	15/08/2014	TDF,3TC,EFV	15/08/2014	NONE	26.2	No signs or symptoms	None	Injectible	42037	YES	CTX	NONE	YES	No	None
03:00:00 PM	34	Positive	44.7	Negative			Yes	682	2015-06-08	#NULL!	#NULL!	4	Yes	4		Yes	2014	Female	5	TB	2	3	Extrapulmonary TB	461	2014-08-20	711	2015-10-26	14	NONE		NONE		NONE	TDF + 3TC + EFV .	20/08/2014	TDF,3TC,EFV	20/08/2014	NONE	25.3	Completed TB Treatment	42068	None		no	CTX	NONE	YES	Yes	None
01:00:00 AM	32.3	Positive	52.3	Negative	Secondary		Yes	587	2015-02-27	#NULL!	#NULL!	21	Yes	21	Yes	Yes	2009	Female	9	None	1	1	Asymptomatic	1365	2011-06-13	794	2015-08-24	50	NONE		NONE		NONE	TDF + 3TC + EFV .	41648	TDF,3TC,EFV	41648	NONE	27.05	No signs or symptoms	None	Injectible	42240	YES	CTX	NONE	YES	Yes	None
01:00:00 AM	48.4	Positive	37.1	Negative			Yes	250	2015-07-28	20	2015-04-14	2		0		Yes	2014	Female	9	None	1	1	Asymptomatic	149	2014-07-26	250	2015-07-28	12	UNDETECTABLE	42110	UNDETECTABLE	42110	Routine Viral load	TDF + 3TC + EFV .	29/08/2014	TDF,3TC,EFV	29/08/2014	NONE	31.2	No signs or symptoms	None	None		YES	CTX	NONE	YES	No	None
04:00:00 AM	34.4	Positive	16.3	Negative				2001	2015-07-31	#NULL!	#NULL!	2		0	Yes	Yes	2014	Female	15	None	1	2	Recurrent URTI	1158	2014-08-28	2001	2015-07-31	11	NONE		NONE		NONE	TDF + 3TC + EFV .	28/08/2014	TDF,3TC,EFV	28/08/2014	None	30	No signs or symptoms	None	None		YES	CTX	NONE	NO	No	None
11:00:00 AM	#NULL!	Negative	47	Positive				284	2015-02-19	20	2015-02-19	2		0		Yes	2012	male	3	Meningitis	4	4	Recurrent Severe Bacterial Infections	140	2014-02-19	284	2015-02-19	12	49885 Copies	41837	UNDETECTABLE	42082	Routine Viral load	AZT + 3TC + LPV/r .	40912	AZT,3TC,LPV/r	40912	NONE	27	No signs or symptoms	None	None		YES	CTX	NONE	NO	No	None
03:00:00 PM	43.8	Positive	41.4	Negative			Yes	902	2015-05-06	#NULL!	#NULL!	7		0		Yes	2014	Female	15	none	1	1	Asymptomatic	689	2014-09-26	902	2015-05-07	7	NONE		NONE		NONE	TDF + 3TC + EFV .	41984	TDF,3TC,EFV	41984	NONE	31.2	No signs or symptoms		None		YES	CTX	NONE	YES	No	None
05:00:00 AM	41.4	Positive	48	Negative			Yes	486	2015-03-17	#NULL!	#NULL!	7		0		Yes	2014	Female	13	chronic ulcer/Septic wound	2	2	Recurrent URTI	505	2014-09-15	496	2015-09-02	11	29040	42261	29040	42261	Routine Viral load	OI Medicines		none		NONE	30.4	No signs or symptoms	None	None		YES	Allergic to CTX	NONE	NO	No	None
07:00:00 AM	28.3	Negative	44.8	Positive			Yes	317	2015-09-29	#NULL!	#NULL!	2		0		Yes	2008	male	8	none	1	1	Asymptomatic	378	2008-09-02	317	2015-09-29	84	NONE		NONE		NONE	TDF + 3TC + EFV .	40949	TDF,3TC,EFV	40949	NONE	29.8	No signs or symptoms	None	None		YES	CTX	NONE	NO	No	None
09:00:00 AM	38.2	Negative	37.7	Positive				546	2015-06-02	20	2015-06-02	3		0		Yes	2009	male	#NULL!	none	1	1	Asymptomatic	129	2014-11-14	546	2015-06-02	6	82 COPIES	16.12.2014	UNDETECTABLE	6.29.2015	Routine Viral load	AZT + 3TC + EFV .	40032	AZT,3TC,EFV	40032	NONE	23.3	No signs or symptoms	None	None		YES	CTX	NONE	NO	No	None
08:00:00 PM	37	Positive	46.8	Negative			Yes	490	2015-08-07	20	2015-02-02	4	Yes	4	Yes	Yes	2009	Female	18	none	3	3	Pneumonia	376	2009-10-19	490	2015-08-07	69	UNDETECTABLE	42083	UNDETECTABLE	42083	Routine Viral load	AZT + 3TC + EFV .	41640	AZT,3TC,EFV	41640	NONE	27.2	No signs or symptoms	None	Implant	42244	YES	CTX	NONE	YES	Yes	Doses were over
02:00:00 AM	33.8	Negative	40.1	Positive			Yes	176	2015-08-27	269870	2015-03-05	3		0		Yes	2014	male	10	allergic rhinitis/ALLERGIC DERMATITIS	2	2	Recurrent URTI	171	2014-12-01	176	2015-08-27	8	213466 COPIES	16.12.2014	269870	05.03.2015	Treatment Failure.	TDF + 3TC + NVP .	41830	AZT,3TC,LPV/r	42202	NONE	23.7	No signs or symptoms	None	None		NO	CTX	NONE	NO	No	None
03:00:00 AM	32.9	Positive	33.8	Negative				339	2015-07-07	4149	2015-04-10	2		0		Yes	2014	Female	5	none	2	2	Minor skin manifestation	339	2015-07-07	339	2015-07-07	#NULL!	4149 COPIES	42110	6255	42213	Routine Viral load	AZT + 3TC + EFV .	41830	AZT,3TC,EFV	41830	NONE	26.2	No signs or symptoms	None	oral Contraceptives		YES	CTX	NONE	NO	No	None
10:00:00 AM	33.2	Positive	35.9	Negative			Yes	543	2015-04-10	20	2015-04-10	0		0		Yes	2014	Female	1	CONJUCTIVITIS	2	2	minor skin manifestation	317	2014-10-24	543	2015-07-09	8	90,208 Copies	17.10.2014	UNDETECTABLE	42110	Routine Viral load	TDF + 3TC + EFV .	24/10/2014	TDF,3TC,EFV	24/10/2014	NONE	19.8	No signs or symptoms	None	None		no	CTX	NONE	YES	No	None
10:00:00 AM	35.3	Positive	#NULL!	Negative	Primary			170	2014-03-07	#NULL!	#NULL!	0		0			2013	Female	3	none	2	2	Minor skin manifestation	297	2014-11-14	446	2015-09-11	9	UNDETECTABLE	42146	UNDETECTABLE	42146	Routine Viral load	TDF + 3TC + EFV .	14/10/2013	TDF,3TC,EFV	14/10/2013	NONE	20.9	No signs or symptoms	None	Implant	42139	YES	CTX	NONE	YES	No	None
09:00:00 AM	32.2	Positive	30.5	Negative				518	2015-05-27	#NULL!	#NULL!	1		0		Yes	2014	Female	10	Bilateral Tubal Blockage	2	2	Minor skin manifestation	329	2014-11-06	575	2015-11-11	12	NONE		NONE		NONE	TDF + 3TC + EFV .	17/11/2014	TDF,3TC,EFV	17/11/2014	none	19.6	No signs or symptoms	None	None		YES	CTX	NONE	NO	No	None
12:00:00 AM	32.2	Positive	41.4	Negative			Yes	861	2015-03-13	#NULL!	#NULL!	5		0		Yes	2014	Female	18	none	1	1	Asymptomatic	698	2014-02-10	861	2015-03-13	13	NONE		NONE		NONE	TDF + 3TC + EFV .	41863	TDF,3TC,EFV	41863	none	24.9	No signs or symptoms	None	None		YES	CTX	NONE	YES	No	None
10:00:00 AM	30.5	Negative	48.8	Positive		Secondary	Yes	830	2015-06-03	20	2015-06-03	2		0		Yes	2001	male	1	none	3	3	Pulmonary TB Smear +	700	2009-06-29	830	2015-06-03	71	221 Copies	41201	UNDETECTABLE	42184	Treatment Failure	AZT + 3TC + LPV/r .	36962	AZT,3TC,LPV/r	36962	none	24.7	No signs or symptoms	None	None		no	CTX	NONE	NO	No	None
10:00:00 AM	#NULL!	Negative	37.4	Positive				415	2015-06-23	20	2015-06-23	5	Yes	5	Yes	Yes	2014	Female	15	Asthma	2	2	Weight loss > 10%	6	2014-12-01	415	2015-06-23	6	27854 COPIES	16.12.2014	UNDETECTABLE	29-06-2015	Routine Viral load	TDF + 3TC + EFV .	15/12/2014	TDF,3TC,EFV	15/12/2014	none	18.1	No signs or symptoms	None	None		yes	CTX	NONE	NO	Yes	Travelled
11:00:00 PM	41.4	Negative	44.8	Positive				568	2015-01-07	#NULL!	#NULL!	8		0		Yes	2015	male	20	HERPES LABIALIS	2	2	Angular chelitis	568	2015-01-07	666	2015-09-30	8	NONE		NONE		NONE	TDF + 3TC + EFV .	21/01/2015	TDF,3TC,EFV	21/01/2015	none	23.8	No signs or symptoms	None	None		yes	CTX	NONE	NO	No	None
04:00:00 AM	30.5	Negative	39	Positive			Yes	321	2015-09-03	#NULL!	#NULL!	1		0		Yes	2010	male	10	Ulcers	1	1	Asymptomatic	395	2015-01-12	321	2015-09-03	7	UNDETECTABLE	28.07.2015	UNDETECTABLE	28.07.2015	Routine Viral load	TDF + 3TC + EFV .	26/01/2015	TDF,3TC,EFV	26/01/2015	none	24.3	No signs or symptoms	None	None		yes	CTX	NONE	NO	No	None
01:00:00 PM	29.4	Positive	32.7	Negative			Yes	619	2015-08-21	#NULL!	#NULL!	2		0		Yes	2015	Female	6	TUBAL/OVARIAN MASS/cyst	2	2	Recurrent URTI	486	2015-01-28	619	2015-08-21	6	UNDETECTABLE	42261	UNDETECTABLE	42261	Routine Viral load	TDF + 3TC + EFV .	28/01/2015	TDF,3TC,EFV	28/01/2015	none	17.8	No signs or symptoms	None	Delivered(14TH JULY 2015)		yes	CTX	NONE	YES	No	None
04:00:00 AM	45.9	Positive	50.2	Negative	Secondary		Yes	574	2015-08-04	20	2013-06-25	4		0		Yes	2006	Female	#NULL!	none	1	1	Asymptomatic	436	2011-03-23	574	2015-08-04	52	NONE		NONE		NONE	TDF + 3TC + EFV .	39814	TDF,3TC,EFV	39814	none	26.6	No signs or symptoms	None	None		yes	CTX	NONE	YES	No	None
09:00:00 AM	57.8	Negative	61.3	Positive			Yes	497	2015-07-27	20	2015-02-10	1		0		Yes	2010	male	#NULL!	TB	4	4	Other WHO Stage IV Condition	131	2014-11-14	497	2015-07-27	8	UNDETECTABLE	42083	UNDETECTABLE	42213	Routine Viral load	TDF + 3TC + EFV .	15/06/2009	TDF,3TC,EFV	15/06/2009	none	24.4	No signs or symptoms	None	None		yes	CTX	NONE	NO	No	None
04:00:00 PM	27.8	Positive	32.7	Negative				390	2015-02-17	19482	2015-02-17	0		0		Yes	2014	Female	2	none	1	1	Asymptomatic	390	2015-02-17	390	2015-02-17	#NULL!	19482 copies	42083	19482	42083	Routine Viral load	TDF + 3TC + EFV .	17/02/2015	TDF,3TC,EFV	17/02/2015	none	27.6	No signs or symptoms	None	None		yes	CTX	NONE	YES	No	None
04:00:00 PM	24	Negative	36.7	Positive			Yes	435	2015-02-17	#NULL!	#NULL!	3		0	Yes	Yes	2015	male	5	RECURRENT URTI	2	2	RECURRENT URTI	435	2015-02-17	315	2015-09-17	7	NONE		NONE		NONE	TDF + 3TC + EFV .	42066	TDF,3TC,EFV	42066	none	19.4	No signs or symptoms	None	None		yes	CTX	NONE	NO	No	None
02:00:00 AM	30.6	Positive	42.5	Negative				598	2015-02-27	#NULL!	#NULL!	0		0		Yes	2015	Female	7	none	1	1	Asymptomatic	598	2015-02-26	732	2015-11-04	8	UNDETECTABLE	42062	UNDETECTABLE	42311	Routine Viral load	TDF + 3TC + EFV .	41799	TDF,3TC,EFV	41799		34.45	No signs or symptoms	None	None		yes	CTX	NONE	YES	No	None
01:00:00 PM	#NULL!	Negative	45.3	Positive				245	2014-10-23	20	2015-03-19	0		0			2006	male	#NULL!	none	3	3	Other WHO Stage III condition	2	2006-07-19	245	2014-10-23	99	UNDETECTABLE	42082	UNDETECTABLE	42082	Routine Viral load	AZT + 3TC + EFV .	38720	AZT,3TC,EFV	38720	none	20.5	No signs or symptoms	None	None		yes	CTX	NONE	NO	No	None
01:00:00 PM	37.3	Positive	39.3	Negative				393	2015-03-10	5662	2015-03-10	2		0	Yes	Yes	2007	Female	#NULL!	none	2	2	Recurrent URTI	393	2015-03-10	649	2015-09-22	6	5662	42083	5662	42083	Routine Viral load	TDF + 3TC + EFV .	17/03/2015	TDF,3TC,EFV	17/03/2015	none	27.6	No signs or symptoms	None	oral Contraceptives	42143	yes	CTX	NONE	NO	No	None
10:00:00 AM	26.6	Positive	28.3	Negative			Yes	498	2015-04-15	#NULL!	#NULL!	4		0		Yes	2015	Female	#NULL!	none	1	1	Asymptomatic	498	2015-04-15	498	2015-04-15	#NULL!	NONE		NONE		NONE	TDF + 3TC + EFV .	15/04/2015	TDF,3TC,EFV	15/04/2015	none	31.4	No signs or symptoms	None	None		yes	CTX	NONE	YES	No	None
05:00:00 PM	30.5	Negative	49.9	Positive		Secondary		436	2015-05-05	#NULL!	#NULL!	1		0			2006	male	#NULL!		3	3	Other WHO Stage III Condition	306	2006-01-03	303	2015-10-08	117	NONE		NONE		NONE	TDF + 3TC + NVP .	41619	TDF,3TC,NVP	41619	none	#NULL!	No signs or symptoms	None	None		yes	CTX	NONE	NO	No	None
11:00:00 PM	31.6	Negative	47.8	Positive			Yes	#NULL!	#NULL!	20	2015-05-12	0		0		Yes	2012	male	#NULL!	HERPES SIMPLEX	1	1	Asymptomatic	#NULL!	#NULL!	#NULL!	#NULL!	#NULL!	UNDETECTABLE	42146	UNDETECTABLE	42146	Routine Viral load	AZT+3TC+NVP .	15/06/2014	AZT,3TC,NVP	15/06/2014	none	23.5	No signs or symptoms	None	None		yes	CTX	NONE	NO	No	None
03:00:00 AM	30.6	Positive	27.3	Negative			Yes	229	2015-04-23	#NULL!	#NULL!	3		0		Yes	2015	Female	2	ASTHMA	1	1	Asymptomatic	229	2015-04-14	378	2015-09-25	5	NONE		NONE		NONE	TDF + 3TC + EFV .	17/04/2015	TDF,3TC,EFV	17/04/2015	none	29.9	No signs or symptoms	None	None		yes	CTX	NONE	YES	No	None
06:00:00 AM	36	Negative	48.6	Positive			Yes	728	2015-05-14	20	2015-05-14	0		0		Yes	2007	male	#NULL!	none	1	1	Asymptomatic	607	2013-02-08	678	2015-11-12	33	UNDETECTABLE	42146	UNDETECTABLE	42146	Routine Viral load	TDF + 3TC + EFV .	22/05/2015	TDF,3TC,EFV	22/05/2015	none	22.6	No signs or symptoms	None	None		yes	CTX	NONE	NO	No	None
06:00:00 PM	33.8	Positive	38.2	Negative				443	2015-06-18	#NULL!	#NULL!	3		0		Yes	2015	Female	13	HTN/ALLERGIC DERMATITIS	1	1	Asymptomatic	446	2015-05-26	443	2015-06-18	#NULL!	NONE		NONE		NONE	TDF + 3TC + EFV .	42069	TDF,3TC,EFV	42069	none	21.88	No signs or symptoms	None	None		yes	CTX	NONE	NO	No	None
10:00:00 PM	30	Negative	38.3	Positive		Secondary	Yes	444	2015-07-14	40	2014-04-08	0		0		Yes	2004	male	#NULL!	ATHRITIS	2	2	Recurrent URTI	431	2014-07-10	444	2015-07-15	12	UNDETECTABLE	28.07.2015	UNDETECTABLE	28.07.2015	Routine Viral load	TDF + 3TC + LPV/r .	15/07/2004	TDF,3TC,LVP/r	15/07/2004	none	30.6	No signs or symptoms	None	None		yes	CTX	NONE	NO	No	None
01:00:00 AM	30.3	Positive	46.8	Negative				202	2015-08-13	#NULL!	#NULL!	1		0		Yes	2015	Female	#NULL!	RECURRENT URTI/TONSILITIS	2	2	Recurrent URTI	202	2015-08-13	202	2015-08-13	#NULL!	NONE		NONE		NONE	TDF + 3TC + EFV .	27/08/2015	TDF,3TC,EFV	27/08/2015	none	22.4	No signs or symptoms	None	None		yes	CTX	NONE	NO	No	None
02:00:00 PM	25	Negative	41.3	Positive			Yes	661	2015-08-26	#NULL!	#NULL!	0		0		Yes	2009	male	#NULL!	none	1	1	Asymptomatic	580	2013-01-14	661	2015-08-27	31	UNDETECTABLE	42261	UNDETECTABLE	42261	Routine Viral load	TDF + 3TC + EFV .	41643	TDF,3TC,EFV	41643	none	27.17	No signs or symptoms	None	None		yes	CTX	NONE	NO	No	None
02:00:00 PM	19.4	Positive	28.3	Negative			Yes	#NULL!	#NULL!	#NULL!	#NULL!	0		0		Yes	2015	Female	#NULL!	none	1	1	Asymptomatic	#NULL!	#NULL!	#NULL!	#NULL!	#NULL!			Test Not yet done			TDF + 3TC + EFV .	42346	TDF,3TC,EFV	42346	none	26	No signs or symptoms	None	PREGNANT(4 Months)		yes	CTX	NONE	YES	No	None
07:00:00 PM	39.3	Positive	40.3	Negative			Yes	1009	2015-08-19	20	2014-08-27	13		0		Yes	2007	Female	13	None	2	2	Recurrent URTI	1573	2014-03-21	1009	2015-08-19	16	<20 copies	27.08.2014	UNDETECTABLE	27.08.2014	Preconception	TDF + 3TC + NVP .	21/03/2014	TDF,3TC,NVP	21/03/2014	NONE	24.3	No signs or symptoms	None	None		YES	CTX	NONE	YES	No	None
11:00:00 PM	35.8	Positive	#NULL!	Negative			Yes	576	2015-06-16	#NULL!	#NULL!	8		0	Yes	Yes	2012	Female	3	NoNE	1	1	Asymptomatic	611	2013-07-30	576	2015-06-16	22	NONE		NONE		NONE	TDF + 3TC + EFV .	21/01/2014	TDF,3TC,EFV	21/01/2014	NONE	26.6	No signs or symptoms	None	None		YES	CTX	NONE	YES	No	None
06:00:00 AM	39.5	Positive	#NULL!	Negative			Yes	444	2015-05-06	90	2014-05-08	1		0	Yes	Yes	2006	Female	13	None	3	3	Pulmonary TB Smear .	426	2013-11-08	469	2015-09-02	21	90 Copies	41766	90	41766	Routine Viral load	TDF + 3TC + EFV .	41619	TDF,3TC,EFV	41619	NONE	18.7	No signs or symptoms	None	oral Contraceptives		YES	CTX	NONE	YES	No	None
03:00:00 AM	42.4	Positive	#NULL!	Negative			Yes	896	2015-07-23	20	2014-09-19	2		0		Yes	2004	Female	9	HTN since 2011	3	3	PTB	651	2013-08-01	896	2015-07-23	23	<20 Copies	19.Sept.2014	UNDETECTABLE	28.07.2015	Preconception	TDF + 3TC + EFV .	41282	TDF,3TC,EFV	41282	NONE	28.4	No signs or symptoms	None	None		YES	CTX	NONE	YES	NO	None
12:00:00 AM	45	Positive	53.4	Negative			Yes	868	2015-04-23	20	2014-11-12	4		0		Yes	2005	Female	7	ARTHRITIS/ALLERGIC DERMATITIS	3	3	LN TB	805	2014-02-06	868	2015-06-27	16	UNDETECTABLE	16.12.2014	UNDETECTABLE	41989	Routine Viral load	TDF + 3TC + EFV .	13/02/2014	TDF,3TC,EFV	13/02/2014	NONE	22.8	No signs or symptoms	None	None		YES	Allergic to CTX	NONE	YES	No	None
08:00:00 PM	39.3	Positive	38.2	Negative			Yes	612	2015-06-05	20	2015-03-19	13		0	Yes	Yes	2013	Female	3	NoNE	1	1	Asymptomatic	220	2013-10-29	626	2015-10-01	23	<40	17.04.2014	UNDETECTABLE	19.03.2015	Preconception	TDF + 3TC + EFV .	41589	TDF,3TC,EFV	41589	NONE	28.7	No signs or symptoms	None	None		YES	CTX	NONE	YES	No	None
11:00:00 AM	30.9	Positive	35.9	Negative			Yes	1048	2015-04-09	90	2014-05-15	12	Yes	12		Yes	2014	Female	4	PUD	1	1	Asymptomatic	935	2014-01-24	992	2015-09-17	19	90 Copies	41773	90	41773	Routine Viral load	TDF + 3TC + EFV .	41732	TDF,3TC,EFV	41732	NONE	20.2	No signs or symptoms	None	PREGNANT		YES	CTX	NONE	YES	Yes	Forgott
08:00:00 PM	25.4	Positive	#NULL!	Negative			Yes	801	2015-01-29	90	2014-07-16	8		0		Yes	2004	Female	8	None	1	1	Asymptomatic	573	2014-01-09	791	2015-09-16	20	90 Copies	41835	90	41835	Routine Viral load	TDF + 3TC + EFV .	18/02/2014	TDF,3TC,EFV	18/02/2014	NONE	24.8	No signs or symptoms	None	None		YES	CTX	NONE	YES	Yes	pill burden
04:00:00 AM	25.7	Positive	30.5	Negative			Yes	741	2015-07-21	20	2015-07-21	4		0		Yes	2009	Female	7	None	2	2	Minor skin manifestation	471	2013-11-06	741	2015-07-21	20	UNDETECTABLE	42110	UNDETECTABLE	42213	Routine Viral load	TDF + 3TC + EFV .	41436	TDF,3TC,EFV	41436	NONE	26.7	No signs or symptoms	None	None		YES	CTX	NONE	YES	No	None
08:00:00 PM	30.1	Positive	#NULL!	Negative			Yes	552	2015-03-17	#NULL!	#NULL!	63		0	Yes	Yes	2009	Female	10	NoNE	2	2	Not indicated in transfer letter	577	2013-07-01	526	2015-09-02	26	UNDETECTABLE	42261	UNDETECTABLE	42261	Routine Viral load	AZT+3TC+NVP .	41281	AZT,3TC,NVP	41281	NONE	23.9	No signs or symptoms	None	Injectable	41682	YES	CTX	NONE	YES	NO	None
12:00:00 AM	30.8	Positive	32.7	Negative			Yes	452	2015-01-21	#NULL!	#NULL!	5	Yes	5	Yes	Yes	2005	Female	7	Ca Cx 2012/PTB 2005	1	1	Asymptomatic	613	2013-07-08	541	2015-09-04	25	NONE		NONE		NONE	AZT+3TC+NVP .	41401	AZT,3TC,NVP	41401	NONE	25.8	No signs or symptoms	None	None		YES	CTX	NONE	YES	Yes	None
11:00:00 PM	32.1	Positive	41.4	Negative			Yes	600	2015-04-01	#NULL!	#NULL!	6	Yes	6		Yes	2012	Female	6	Vag Candidiasis	2	2	Weight Loss 2012	605	2013-10-08	524	2015-08-25	22	UNDETECTABLE	41183	UNDETECTABLE	41197	Preconception	AZT + 3TC + EFV .	41496	AZT,3TC,EFV	41496	NONE	25.2	No signs or symptoms	None	PREGNANT		YES	CTX	NONE	YES	YES	None
05:00:00 PM	34.1	Positive	43.6	Negative			Yes	719	2015-02-17	20	2015-02-17	3		0		Yes	2013	Female	4	adenomyoma/myoma/hydrosalpinges aug 2013	2	2	Reccurent URTI	511	2013-08-15	725	2015-10-05	25	6944 copies	27.06.2013	UNDETECTABLE	42083	Preconception	TDF + 3TC + EFV .	41793	TDF,3TC,EFV	41793	NONE	29.2	No signs or symptoms	None	None		YES	CTX	NONE	YES	YES	None
04:00:00 AM	35.9	Positive	40.3	Negative			Yes	690	2015-06-02	90	2014-05-28	28		0	Yes	Yes	2004	Female	7	loose stool, ALLERGIC DERMATITIS/oedema	1	1	Asymptomatic	727	2013-08-02	626	2015-09-24	25	90 Copies	41786	90	41786	Routine Viral load	TDF + 3TC + EFV .	41313	TDF,3TC,EFV	41313	NONE	32.7	No signs or symptoms	None	None		YES	CTX	NONE	YES	NO	None
04:00:00 PM	42.2	Positive	#NULL!	Negative			Yes	888	2015-04-27	20	2014-04-08	6	Yes	6		Yes	2008	Female	6	NoNE	2	2	Reccurent URTI	460	2013-10-28	672	2015-09-16	22	78 COPIES	41572	UNDETECTABLE	41855	preconception	AZT + 3TC + EFV .	25/10/2013	AZT,3TC,EFV	25/10/2013	NONE	24.8	No signs or symptoms	None	PREGNANT		YES	CTX	NONE	YES	YES	Forgot
08:00:00 AM	47.3	Positive	55.6	Negative				776	2015-06-22	#NULL!	#NULL!	32		0	Yes	Yes	2006	Female	23	MENORRHAGIA	2	2	Reccurent URTI/MENORRHAGIA/ALLERGIC RHINITIS	911	2013-05-09	776	2015-06-22	25	NONE		NONE		NONE	TDF + 3TC + EFV	41310	TDF,3TC,EFV	41310	NONE	25.8	No signs or symptoms	None	Injectable	42093	YES	CTX	NONE	NO	NO	None
09:00:00 AM	35.2	Positive	37.1	Negative				1093	2015-04-10	20	2014-10-22	6		0		Yes	2013	Female	10	Hypertension,	1	1	Asymptomatic	438	2013-10-18	1093	2015-04-10	17	UNDETECTABLE	41934	UNDETECTABLE	41934	Preconception	TDF + 3TC + EFV .	41497	TDF,3TC,EFV	41497	NONE	29.7	No signs or symptoms	None	None		YES	CTX	NONE	YES	No	None
12:00:00 PM	29.2	Positive	32.7	Negative			Yes	643	2015-07-15	1670	2015-03-12	8		0		Yes	2014	Female	5	allergic rhinitis	1	1	Asymptomatic	516	2014-02-18	643	2015-07-15	16	3002	41323	1670	42083	Treatment Failure.	AZT + 3TC + LPV/r .	25/02/2014	AZT,3TC,LPV/r	25/02/2014	NONE	25.9	No signs or symptoms	None	None		YES	CTX	NONE	YES	No	None
11:00:00 PM	33.8	Positive	32.7	Negative			Yes	260	2015-04-24	20	2015-03-24	0		0		Yes	2014	Female	1.6	none	1	1	Asymptomatic	204	2014-02-28	358	2015-10-19	19	UNDETECTABLE	42082	UNDETECTABLE	42082	Routine Viral load	TDF + 3TC + EFV .	15/07/2014	TDF,3TC,EFV	15/07/2014	none	18.4	No signs or symptoms	None	None		yes	CTX	NONE	YES	No	None
12:00:00 AM	26.8	Positive	36	Negative			Yes	622	2015-02-02	20	2014-12-19	2	Yes	2		Yes	2014	Female	3	None	2	2	Minor skin manifestation	641	2014-03-26	780	2015-08-28	17	UNDETECTABLE	16.12.2014	UNDETECTABLE	16.12.2014	Routine Viral load	AZT+3TC+NVP .	26/03/2014	AZT,3TC,NVP	26/03/2014	NONE	21.6	No signs or symptoms	None	PREGNANT		YES	CTX	NONE	YES	Yes	Forgott
01:00:00 AM	33.5	Positive	37.1	Negative			Yes	273	2015-04-30	20	2015-03-05	7		0		Yes	2014	Female	#NULL!	ALLERGIC DERMATITIS	3	3	PTB	374	2014-03-27	320	2015-08-28	17	214 COPIES	27.03.2014	UNDETECTABLE	19.03.2015	Preconception	TDF + 3TC + EFV .	27/03/2014	TDF,3TC,EFV	27/03/2014	NONE	30.4	No signs or symptoms	None	None		YES	Allergic to CTX	NONE	YES	No	None
07:00:00 PM	34.8	Positive	#NULL!	Negative			Yes	425	2015-04-15	90	2014-04-29	2		0		Yes	2007	Female	10	none	2	2	Reccurent URTI	389	2011-08-26	425	2015-04-15	43	90 Copies	41757	90	41757	Routine Viral load	AZT+3TC+NVP .	23/04/2014	AZT,3TC,NVP	23/04/2014	NONE	23.1	No signs or symptoms	None	None			CTX	NONE	YES	No	None
10:00:00 AM	30	Positive	37.1	Negative			Yes	330	2015-05-18	20	2015-05-18	1		0		Yes	2005	Female	8	none	3	3	Pneumonia	125	2013-10-02	330	2015-05-18	19	UNDETECTABLE	42146	UNDETECTABLE	42146	Routine Viral load	TDF + 3TC + EFV .	41284	TDF,3TC,EFV	41284	none	27.6	No signs or symptoms	None	None		yes	CTX	NONE	YES	No	None
06:00:00 PM	43.3	Positive	44.7	Negative	Secondary			530	2015-06-19	20	2015-06-19	9		0	Yes	Yes	2002	Female	21	None	1	1	Asymptomatic	348	2013-11-20	530	2015-06-19	18	279 copies	18.03.2014	UNDETECTABLE	6.29.2015	Preconception	TDF + 3TC + EFV .	20/11/2013	TDF,3TC,EFV	20/11/2013	NONE	15.6	No signs or symptoms	None	None		YES	none(Allergic to sulphur)	NONE	YES	No	None
10:00:00 AM	33.6	Positive	32.7	Negative			Yes	219	2015-08-06	90	2014-05-09	16		0		Yes	2013	Female	8	Diabetes, TB,	3	3	Pulmonary TB Smear.	9	2013-09-25	219	2015-08-06	22	90 Copies	41744	90	41744	Routine Viral load	TDF + 3TC + EFV .	41588	TDF,3TC,EFV	41588	NONE	24.7	Completed Treatment	(March 2014)Completed Treatment	None		YES	CTX	TB	YES	No	None
01:00:00 AM	33.6	Positive	#NULL!	Negative			Yes	578	2015-02-05	20	2013-10-30	6		0	Yes	Yes	2011	Female	4	NoNE	1	2	Recurrent oral ulceration	580	2012-12-01	654	2015-09-25	33	<20copies	41577	UNDETECTABLE	41577	Preconception	AZT + 3TC + EFV .	23/08/2013	AZT,3TC,EFV	23/08/2013	NONE	22.7	No signs or symptoms	None	injectible	42096	YES	CTX	NONE	YES	No	None
07:00:00 AM	28.3	Positive	24	Negative	Primary			823	2015-06-02	90	2014-06-27	20		0	Yes	Yes	2012	Female	#NULL!	ARTHRITIS	1	1	Asymptomatic	396	2012-05-25	823	2015-06-08	36	90 Copies	41817	90	41817	Routine Viral load	TDF + 3TC + EFV .	20/06/2014	TDF,3TC,EFV	20/06/2014	NONE	22.9	No signs or symptoms	None	Injectible	41873	YES	CTX	NONE	NO	No	None
08:00:00 AM	28.3	Negative	33	Positive			Yes	521	2014-11-05	20	2014-05-27	11		0		Yes	2011	male	4	Hypertension, septic tonsilitis	1	1	Asymptomatic	405	2013-06-19	157	2015-10-01	27	UNDETECTABLE	41886	UNDETECTABLE	41886	Preconception	TDF + 3TC + EFV .	19/06/2013	TDF,3TC,EFV	19/06/2013	NONE	24.6	No signs or symptoms	None	None		YES	CTX	NONE	YES	NO	None
06:00:00 PM	36	Negative	52.1	Positive			Yes	727	2015-10-05	20	2014-09-08	9		0		Yes	2010	male	#NULL!	mild hypertension,	1	1	Asymptomatic	1065	2013-07-23	727	2015-10-05	26	216 copies	41696	UNDETECTABLE	41890	preconception	TDF + 3TC + EFV .	23/07/2013	TDF,3TC,EFV	23/07/2013	NONE	32.6	No signs or symptoms	None	None		YES	CTX	NONE	YES	NO	None
05:00:00 PM	34.3	Positive	39.3	Negative			Yes	434	2015-05-22	20	2015-06-19	2		0		Yes	2014	Female	7	VARICOSITIES	2	2	Minor skin manifestation	157	2014-11-14	434	2015-05-22	6	19222 COPIES	16.12.2014	UNDETECTABLE	42184	Routine Viral load	TDF + 3TC + EFV .	28/11/2014	TDF,3TC,EFV	28/11/2014	none	29.2	No signs or symptoms	None	None		YES	CTX	NONE	YES	No	None
12:00:00 AM	#NULL!	Negative	38.4	Positive				373	2015-04-27	#NULL!	#NULL!	3		0		Yes	2014	male	2	none	2	2	Other WHO Stage II Condition	289	2014-10-28	328	2015-11-13	12	NONE		NONE		NONE	TDF + 3TC + EFV .	41954	TDF,3TC,EFV	41954	NONE	26.1	No signs or symptoms	None	None		YES	CTX	NONE	YES	No	None
04:00:00 PM	31	Negative	38.5	Positive			Yes	284	2015-03-17	20	2015-06-08	0		0		Yes	2013	male	#NULL!	none	2	2	Recurrent URTI	162	2013-12-17	419	2015-09-21	21	1836	42083	UNDETECTABLE	42184	Preconception	TDF + 3TC + EFV .	31/12/2013	TDF,3TC,EFV	31/12/2013	none	28.3	No signs or symptoms	None	None		yes	CTX	NONE	YES	No	None
06:00:00 AM	33.8	Negative	43.1	Positive				735	2015-07-15	20	2015-03-20	4		0		Yes	2008	male	#NULL!	NoNE	1	1	Asymptomatic	759	2013-04-30	735	2015-07-15	26	26 COPIES	27.05.2014	UNDETECTABLE	42146	Preconception	TDF,3TC,EFV	39965	TDF,3TC,EFV	39965	NONE	25.9	No signs or symptoms	None	None		YES	CTX	NONE	YES	NO	None
10:00:00 PM	39.3	Negative	57.3	Positive			Yes	620	2015-09-03	20	2014-04-10	5		0		Yes	2008	male	4	ATHRITIS/herpes zoster	1	1	Asymptomatic	708	2013-05-27	620	2015-09-03	27	UNDETECTABLE	41916	UNDETECTABLE	42213	preconception	AZT+3TC+NVP .	20/08/2013	AZT,3TC,NVP	20/08/2013	NONE	22.7	No signs or symptoms	None	None		YES	CTX	NONE	YES	No	None
06:00:00 AM	#NULL!	Negative	41.1	Positive		Primary	Yes	432	2015-04-22	20	2014-10-13	1		0		Yes	2011	male	3	none	3	3	Pulmonary TB Smear+	301	2011-11-01	423	2015-10-19	47	UNDETECTABLE	13.10.2014	UNDETECTABLE	13.10.2014	Preconception	TDF + 3TC + EFV .	41764	TDF,3TC,EFV	41764	NONE	21.5	No signs or symptoms	None	Pregnant		YES	CTX	NONE	YES	No	None
10:00:00 AM	27.3	Negative	38.3	Positive		College/University		576	2015-06-10	20	2015-06-10	3		0		Yes	2008	male	7	HTN	2	2	Parotid Enlargement	767	2011-03-28	576	2015-06-11	50	<20 copies	41813	UNDETECTABLE	42181	Preconception	AZT + 3TC + EFV .	16/06/2014	AZT,3TC,EFV	16/06/2014	NONE	26	No signs or symptoms	None	None		YES	CTX	NONE	YES	No	None
04:00:00 PM	#NULL!	Negative	36.9	Positive			Yes	940	2015-05-28	20	2014-03-05	0		0		Yes	2004	male	12	NoNE	3	3	PTB 2004	899	2012-11-20	940	2015-05-28	30	UNDETECTABLE	41576	UNDETECTABLE	42261	Preconception	TDF + 3TC + EFV .	29/10/2013	TDF,3TC,EFV	29/10/2013	NONE	19.4	No signs or symptoms	None	None		YES	CTX	NONE	YES	No	None
08:00:00 PM	25.8	Positive	34.8	Negative			Yes	463	2015-06-05	20	2014-09-09	10		0	Yes	Yes	2009	Female	8	NoNE	2	2	Skin manifestation	616	2013-07-01	436	2015-06-05	23	UNDETECTABLE	09.09.2014	UNDETECTABLE	09.09.2014	Preconception	TDF + 3TC + EFV .	41913	TDF,3TC,EFV	41913	NONE	27.5	No signs or symptoms	None	Pegnant		YES	CTX	NONE	YES	NO	None
02:00:00 AM	36	Negative	49.3	Positive			Yes	617	2015-04-29	#NULL!	#NULL!	1		0		Yes	2008	male	#NULL!	none	2	3	Recurrent URTI	327	2008-04-28	617	2015-04-29	84	<20 copies	05.01.2015	UNDETECTABLE	05.01.2015	Preconception	TDF + 3TC + EFV .	40887	TDF,3TC,EFV	40887	NONE	27.6	No signs or symptoms	None	Pregnant		YES	CTX	NONE	YES	No	None
05:00:00 PM	26	Positive	39.3	Negative			Yes	571	2015-02-23	20	2014-11-12	13		0		Yes	2013	Female	2	Hypertension/ATHRITIS	2	2	Seborrheic dermatitis	432	2013-07-22	624	2015-09-14	25	UNDETECTABLE	16.12.2014	UNDETECTABLE	16.12.2014	Routine Viral load	TDF + 3TC + EFV .	22/07/2013	TDF,3TC,EFV	22/07/2013	NONE	26	No signs or symptoms	None	None		YES	CTX	NONE	YES	NO	None
05:00:00 AM	30.5	Negative	32.1	Positive			Yes	590	2015-04-21	20	2014-10-23	1		0		Yes	2008	male	3	allergic rash,	1	1	Asymptomatic	425	2013-11-07	590	2015-04-22	17	UNDETECTABLE	23.Oct.14	UNDETECTABLE	23.Oct.14	preconception	TDF + 3TC + EFV .	41466	TDF,3TC,EFV	41466	NONE	25.4	No signs or symptoms	None	None		YES	CTX	NONE	YES	No	None
02:00:00 AM	42.5	Negative	46.3	Positive		Primary	Yes	844	2015-03-18	122	2015-03-18	4		0		Yes	2000	male	24	HTN	2	2	Recurrent URTI	167	2005-01-07	550	2015-09-09	128	122	42082	122	42082	Routine Viral load	TDF + 3TC + EFV .	19/08/2014	TDF,3TC,EFV	19/08/2014	NONE	25.2	Suspected TB.	42282	None		no	CTX	NONE	YES	No	None
07:00:00 PM	26.2	Negative	34.9	Positive			Yes	560	2015-05-14	20	2015-03-19	3	Yes	3		Yes	2012	male	3	none	1	3	Pulmonary TB Smear +	665	2014-05-27	560	2015-05-14	11	60 COPIES	27.05.2014	UNDETECTABLE	19.03.2015	Preconception	TDF + 3TC + EFV .	41856	TDF,3TC,EFV	41856	NONE	30.1	No signs or symptoms	None	pregnant		YES	CTX	NONE	YES	Yes	None
04:00:00 AM	42.5	Negative	45.6	Positive			Yes	148	2015-05-15	1349	2014-03-31	5		0		Yes	2014	male	3	TINEA VESICOLAR	3	3	Oral Candidiasis Thrush	3	2014-03-06	148	2015-05-15	14	157139	41704	1349	41729	Treatment Failure.	TDF + 3TC + EFV .	41353	AZT,3TC,LPV/r	41736	NONE	23.5	No signs or symptoms	None	None		YES	CTX	NONE	NO	No	None
05:00:00 PM	30	Negative	45.3	Positive		Primary		285	2015-08-27	20	2015-02-12	2		0		Yes	2012	male	19	Hypertension	2	2	Weight loss < 10%	162	2012-02-28	285	2015-08-27	41	UNDETECTABLE	42083	UNDETECTABLE	42261	Routine Viral load	TDF + 3TC + EFV .	40911	TDF,3TC,EFV	40911	NONE	25.99	No signs or symptoms	None	None		YES	CTX	NONE	NO	No	None
07:00:00 AM	#NULL!	Negative	37.3	Positive		Secondary		365	2015-09-02	20	2014-11-04	3		0		Yes	2012	male	#NULL!	none	1	1	Asymptomatic	355	2013-02-15	365	2015-09-02	30	<20 copies	05.11.2014	8254	09.14.2015	Routine Viral load	TDF + 3TC + EFV .	20/05/2014	TDF,3TC,EFV	20/05/2014	NONE	27.7	No signs or symptoms	None	None		YES	CTX	NONE	YES	No	None
01:00:00 AM	26.2	Negative	32.5	Positive			Yes	213	2014-06-16	20	2015-05-25	4		0		Yes	2014	male	#NULL!	None	1	1	Asymptomatic	213	2014-06-16	213	2014-06-16	#NULL!	UNDETECTABLE	16.12.2014	UNDETECTABLE	6.29.2015	Routine Viral load	TDF + 3TC + EFV .	18/08/2014	TDF,3TC,EFV	18/08/2014	NONE	23.8	No signs or symptoms	None	pregnant		YES	CTX	NONE	YES	No	None
01:00:00 AM	30.5	Negative	38.3	Positive			Yes	600	2015-06-08	20	2015-05-19	1		0		Yes	2014	male	14	None	1	1	Asymptomatic	520	2014-03-04	600	2015-06-08	15	UNDETECTABLE	42082	UNDETECTABLE	42085	Routine Viral load	TDF + 3TC + NVP .	41704	TDF,3TC,NVP	41704	NONE	20.5	No signs or symptoms	None	None		YES	CTX	NONE	YES	No	None
12:00:00 AM	32.7	Negative	40.1	Positive				334	2015-08-18	20	2015-03-06	2		0		Yes	2011	male	7	Septic wound/ulcer/CHRONIC ULCER	4	4	Extrapulmonary TB	229	2015-02-26	334	2015-08-17	5	UNDETECTABLE	42068	UNDETECTABLE	42068	Routine Viral load	TDF + 3TC + EFV .	40554	TDF,3TC,EFV	40554	none	23.3	No signs or symptoms	None	None		yes	CTX	NONE	YES	No	None
06:00:00 PM	36	Negative	39.4	Positive			Yes	740	2015-07-28	20	2015-07-22	4	Yes	4		Yes	2013	Female	#NULL!	None	1	1	Asymptomatic	517	2013-12-24	448	2014-01-02	#NULL!	NONE		NONE		NONE	TDF + 3TC + EFV .	24/12/2013	TDF,3TC,EFV	24/12/2013	Yes	24.3	No signs or symptoms	None	None		YES	CTX	NONE	NO	Yes	side effects.
07:00:00 AM	30.5	Negative	32.3	Positive			Yes	540	2015-06-22	#NULL!	#NULL!	0		0		Yes	2011	male	8	allergic rhinitis	2	2	Minor skin manifestation	1183	2014-03-06	541	2015-06-22	15	UNDETECTABLE	42146	UNDETECTABLE	42146	Routine Viral load	TDF + 3TC + NVP .	40919	TDF,3TC,NVP	40919	none	27.1	No signs or symptoms	None	None		no	CTX	NONE	YES	No	None
06:00:00 AM	39.2	Positive	40.3	Negative	College/University		Yes	386	2015-03-03	20	2015-03-05	1		0		Yes	2007	Female	8	none	4	4	Other WHO Stage IV Condition	2	2007-01-25	339	2015-08-17	102	UNDETECTABLE	42068	UNDETECTABLE	42068	Routine Viral load	TDF + 3TC + EFV .	15/01/2006	TDF,3TC,EFV	15/01/2006	none	31.2	No signs or symptoms	None	None		yes	CTX	NONE	YES	No	None
06:00:00 PM	31.6	Negative	36.7	Positive				568	2015-01-02	44	2015-05-22	0		0		Yes	2012	male	#NULL!	none	4	4	KS Cutaneous	4	2012-09-03	217	2015-09-07	36	44 copies	42146	44	42146	Routine Viral load	TDF + 3TC + EFV .	41731	TDF,3TC,EFV	41731	none	30.5	No signs or symptoms	None	pregnant		yes	CTX	NONE	YES	No	None
10:00:00 PM	36	Negative	41.8	Positive			Yes	371	2015-09-04	20	2015-06-29	1		0		Yes	2014	male	10	None	1	4	Extrapulmonary TB	98	2011-04-01	371	2015-09-04	53	UNDETECTABLE	42146	UNDETECTABLE	42146	Routine Viral load	TDF + 3TC + EFV .	28/02/2014	TDF,3TC,EFV	28/02/2014	NONE	22.1	No signs or symptoms	None	None		YES	CTX	NONE	NO	No	None
07:00:00 AM	43.4	Positive	34.8	Negative			Yes	713	2015-03-10	20	2015-06-10	2		0		Yes	2014	Female	2	none	1	1	Asymptomatic	623	2014-03-21	922	2015-09-14	17	9111 COPIES	41732	UNDETECTABLE	42181	Routine Viral load	TDF + 3TC + EFV .	30/09/2014	TDF,3TC,EFV	30/09/2014	NONE	21.02	No signs or symptoms	None	None		YES	CTX	NONE	YES	No	None
08:00:00 PM	38.4	Positive	1.1	Negative				7	2014-11-17	#NULL!	#NULL!	3		0		Yes	2014	Female	11	PNEUMONIA R/TB	3	3	Pneumonia	7	2014-11-17	84	2014-09-14	#NULL!	UNDETECTABLE	42146	UNDETECTABLE	42146	Routine Viral load	TDF + 3TC + EFV .	41710	TDF,3TC,EFV	41710	none	19.8	On Treatment	42145	None		YES	CTX	TB	NO	No	None
11:00:00 PM	32.4	Positive	36	Negative			Yes	578	2015-04-09	20	2015-06-16	1		0		Yes	2006	Female	#NULL!	none	1	1	Asymptomatic	557	2015-01-07	550	2015-10-09	9	UNDETECTABLE	42184	UNDETECTABLE	42184	Routine Viral load	TDF + 3TC + EFV .	39417	TDF,3TC,EFV	39417	none	29.8	No signs or symptoms	None	None		yes	CTX	NONE	YES	No	None
11:00:00 AM	29.4	Negative	43.3	Positive			Yes	342	2015-10-05	20	2014-07-04	4		0		Yes	2013	male	9	Depression	4	4	PCP	66	2013-05-29	342	2015-10-05	28	33 copies	41652	33	41652	Preconception	TDF + 3TC + EFV	13/06/2013	TDF,3TC,EFV	30/05/2013	NONE	26.1	No signs or symptoms	None	None		YES	CTX	NONE	YES	NO	None
12:00:00 AM	#NULL!	Negative	39	Positive			Yes	321	2015-03-24	20	2014-08-01	4		0		Yes	2012	male	6	None	2	2	Weight Loss	342	2014-02-11	321	2015-03-24	13	819 copies	41681	UNDETECTABLE	41852	Preconception	TDF + 3TC + EFV .	27/01/2014	TDF,3TC,EFV	27/01/2014	NONE	19.7	No signs or symptoms	None	None		YES	CTX	NONE	YES	Yes	Domestic raws
01:00:00 PM	31.8	Positive	#NULL!	Negative	Primary		Yes	817	2015-05-11	90	2014-07-28	4		0		Yes	2009	Female	11	CANDIDIASIS/ANAEMIA	2	2	weight loss <10%	743	2011-07-27	507	2015-10-27	51	90 Copies	41793	UNDETECTABLE	42261	Routine Viral load	TDF + 3TC + EFV .	26/05/2014	TDF,3TC,EFV	26/05/2014	NONE	27.2	No signs or symptoms	None	None		YES	CTX	NONE	YES	No	None
09:00:00 AM	30.5	Negative	38.4	Positive		College/University	Yes	657	2015-07-22	20	2015-02-13	1		0		Yes	2012	male	3	None	4	4	PCP	106	2012-01-23	657	2015-07-01	41	UNDETECTABLE	42048	UNDETECTABLE	42213	Routine Viral load	ABC/3TC/EFV .	40916	TDF,3TC,EFV	42178	NONE	25.5	No signs or symptoms	None	None		YES	CTX	NONE	YES	No	None
01:00:00 AM	#NULL!	Negative	38.3	Positive				398	2015-08-21	20	2014-10-29	1		0		Yes	2008	male	5	HTN/TINEA VESICOLAR	2	2	Minor skin manifestation	383	2013-11-14	398	2015-08-21	21	UNDETECTABLE	29.10.2014	UNDETECTABLE	14.09.2015	Preconception	AZT+3TC+NVP .	15/06/2008	AZT,3TC,NVP	15/06/2008	NONE	31.9	No signs or symptoms	None	None		YES	CTX	NONE	YES	No	None
10:00:00 AM	26.2	Negative	43.6	Positive				477	2015-06-08	#NULL!	#NULL!	5		0		Yes	2013	male	6	ALLERGIC CONJUCTIVITIS,	2	2	Herpes zoster	269	2013-12-06	431	2015-10-22	22	NONE		NONE		NONE	AZT+3TC+NVP .	41437	AZT,3TC,NVP	41437	NONE	22.9	No signs or symptoms	None	None		YES	CTX	NONE	YES	No	None
05:00:00 AM	31.6	Negative	36.1	Positive			Yes	555	2015-08-13	20	2015-03-19	3		0		Yes	2011	male	3	None	1	1	Asymptomatic	421	2014-01-15	555	2015-08-13	18	UNDETECTABLE	42082	UNDETECTABLE	42082	Routine Viral load	TDF + 3TC + EFV .	27/02/2014	TDF,3TC,EFV	27/02/2014	NONE	31.8	No signs or symptoms	None	Pregnant		YES	CTX	NONE	YES	No	None
04:00:00 AM	42.5	Negative	49.3	Positive			Yes	557	2015-01-23	20	2015-07-09	3		0		Yes	2007	male	#NULL!	HTN	1	1	Asymptomatic	502	2014-03-07	467	2015-07-09	16	45 COPIES	41788	UNDETECTABLE	42235	Preconception	TDF + 3TC + EFV .	41793	TDF,3TC,EFV	41793	NONE	25.4	No signs or symptoms	None	None		YES	CTX	PPE,	YES	No	None
07:00:00 PM	41.4	Negative	52.3	Positive				1002	2015-08-10	20	2015-08-10	6		0		Yes	2007	male	10	hptn, Hypertension,	1	1	Asymptomatic	957	2012-07-01	1002	2015-08-10	37	UNDETECTABLE	41599	UNDETECTABLE	42235	Preconception	TDF + 3TC + EFV	41822	TDF,3TC,EFV	41677	NONE	30.2	No signs or symptoms	None	None		YES	CTX	NONE	YES	NO	None
02:00:00 PM	33.8	Negative	38.8	Positive			Yes	240	2015-08-06	20	2015-05-15	2		0		Yes	2013	male	#NULL!	HERPES SIMPLEX	1	1	Asymptomatic	214	2014-06-20	240	2015-08-06	13	UNDETECTABLE	42146	UNDETECTABLE	42146	Routine Viral load	TDF + 3TC + NVP .	30/04/2014	TDF,3TC,NVP	30/04/2014	NONE	26.7	No signs or symptoms	None	None		YES	CTX	NONE	YES	No	None
02:00:00 PM	27.3	Negative	30.9	Positive			Yes	810	2015-04-17	197	2014-02-20	6		0		Yes	2008	male	8	Hyperacidity/Mouth ulcers	1	1	Asymptomatic	574	2014-02-20	817	2015-10-14	19	197 copies	41690	UNDETECTABLE	41950	Preconception	TDF + 3TC + EFV .	20/02/2014	TDF,3TC,EFV	20/02/2014	NONE	28.1	No signs or symptoms	None	None		YES	CTX	NONE	YES	No	None
05:00:00 PM	39.3	Positive	46.8	Negative			Yes	178	2015-06-08	20	2015-06-08	3		0		Yes	2002	male	12	allergic rhinitis/htn	1	1	Asymptomatic	56	2014-05-30	178	2015-06-08	12	UNDETECTABLE	41803	UNDETECTABLE	42184	Preconception	TDF + 3TC + EFV .	13/06/2014	TDF,3TC,EFV	13/06/2014	NONE	22.9	No signs or symptoms	None	None		YES	CTX	NONE	YES	No	None
05:00:00 PM	29.4	Negative	40.8	Positive			Yes	1065	2015-04-29	20	2014-01-15	1		0		Yes	2009	male	#NULL!	NoNE	3	3	Pulmonary TB Smear +	400	2008-06-30	1260	2015-10-22	87	205 Copies	41549	UNDETECTABLE	41654	Preconception	TDF + 3TC + EFV .	41914	TDF,3TC,EFV	41914	NONE	26.8	No signs or symptoms	None	None		YES	CTX	NONE	YES	No	None
03:00:00 AM	#NULL!	Negative	43.3	Positive		Secondary	Yes	719	2015-08-10	20	2015-08-19	1		0		Yes	2010	male	11	HTN	1	1	Asymptomatic	363	2010-08-31	719	2015-08-10	59	<20 copies	05.11.2014	UNDETECTABLE	42236	Preconception	TDF + 3TC + EFV .	40643	TDF,3TC,EFV	40643	NONE	37.8	No signs or symptoms	None	None		YES	CTX	NONE	YES	No	None
09:00:00 AM	29.4	Negative	35.8	Positive			Yes	411	2015-03-03	20	2015-06-16	0		0		Yes	2014	male	1	PPE	2	2	Recurrent URTI	389	2014-09-09	374	2015-09-07	11	UNDETECTABLE	42184	UNDETECTABLE	42276	Routine Viral load	TDF + 3TC + EFV .	16/09/2014	TDF,3TC,EFV	16/09/2014	NONE	20	No signs or symptoms	None	None		YES	CTX	PPE	NO	No	None
[truncated: 125 more columns]
